# Supplementary material for: Featurization strategies for polymer sequence or composition design by machine learning
Source: Royal Society of Chemistry journal article supplement (doi:10.1039/d1me00160d), 2022-01-01
Supplement: d1me00160d1.csv [file d1me00160d1.csv]

Number Encoding	Letter Encoding	Name	SMILES	SP	MFP	OHE	Embedding	Sigma	hydropathy	charge	mordred	ESP
0	A	Alanine	C[C@@H](C(=O)O)N	(0.38174005383115966, 0.0, 0.73, 0.743362831858407)	(0.0, 0.0, 0.0, 0.0, 0.0, 0.0, 0.0, 0.0, 0.0, 0.0, 0.0, 0.0, 0.0, 0.0, 0.0, 0.0, 0.0, 0.0, 0.0, 0.0, 0.0, 0.0, 0.0, 0.0, 0.0, 0.0, 0.0, 0.0, 0.0, 0.0, 0.0, 0.0, 0.0, 0.0, 0.0, 0.0, 0.0, 0.0, 0.0, 0.0, 0.0, 0.0, 0.0, 0.0, 0.0, 0.0, 0.0, 0.0, 0.0, 0.0, 0.0, 0.0, 0.0, 0.0, 0.0, 0.0, 0.0, 0.0, 0.0, 0.0, 0.0, 0.0, 0.0, 1.0, 0.0, 0.0, 0.0, 0.0, 0.0, 0.0, 0.0, 0.0, 0.0, 0.0, 0.0, 0.0, 1.0, 0.0, 0.0, 0.0…	(1.0, 0.0, 0.0, 0.0, 0.0, 0.0, 0.0, 0.0, 0.0, 0.0, 0.0, 0.0, 0.0, 0.0, 0.0, 0.0, 0.0, 0.0, 0.0, 0.0)	1	5.04	0.73	0	(0.25, 0.0, 0.3959390862944162, 0.021676300578034685, 0.0, 0.0, 0.5538461538461539, 0.0, 0.15909056300878663, 0.22129186602870812, 0.6169231284714178, 0.1763120095971712, 0.011958549873295343, 0.7754101355551959, 0.5720556247410368, 0.6011847888400537, 0.708693619588168, 0.966013362283151, 0.965487669067144, 0.9707453773384865, 0.9816567851283703, 0.644457581960288, -0.5195672828508677, 0.1877579…	(0.38174005383115966, 0.0, 0.8527918781725888, 0.8580750407830341, 0.859223300970874, 0.8629921259842521, 0.867579908675799, 0.8457446808510637, 0.8646967340590981, 0.8657407407407406, 0.867579908675799, 0.8657407407407406, 0.8657407407407406, 0.8603531300160512, 0.8589951377633711, 0.8640624999999998, 0.8695652173913043, 0.854515050167224, 0.8596774193548387, 0.8623417721518988, 0.87168141592920…
1	C	Cysteine	C([C@@H](C(=O)O)N)S	(0.5536976828752779, 0.0, 0.595, 0.808259587020649)	(1.0, 0.0, 0.0, 0.0, 0.0, 0.0, 0.0, 0.0, 0.0, 0.0, 0.0, 0.0, 0.0, 0.0, 0.0, 0.0, 0.0, 0.0, 0.0, 0.0, 0.0, 0.0, 0.0, 0.0, 0.0, 0.0, 0.0, 0.0, 0.0, 0.0, 0.0, 0.0, 0.0, 0.0, 0.0, 0.0, 0.0, 0.0, 0.0, 0.0, 0.0, 0.0, 0.0, 0.0, 0.0, 0.0, 0.0, 0.0, 0.0, 0.0, 0.0, 0.0, 0.0, 1.0, 0.0, 0.0, 0.0, 0.0, 0.0, 0.0, 0.0, 0.0, 0.0, 1.0, 0.0, 0.0, 0.0, 0.0, 0.0, 0.0, 0.0, 0.0, 1.0, 0.0, 0.0, 0.0, 0.0, 0.0, 0.0, 0.0…	(0.0, 1.0, 0.0, 0.0, 0.0, 0.0, 0.0, 0.0, 0.0, 0.0, 0.0, 0.0, 0.0, 0.0, 0.0, 0.0, 0.0, 0.0, 0.0, 0.0)	2	5.48	0.595	0	(0.25, 0.033950617283950615, 0.44604248918969724, 0.08777563690858489, 0.004373177842565597, 0.0, 0.5320105820105819, 0.05144032921810698, 0.0, 0.22129186602870812, 1.0, 1.0, 0.09241248869237692, 0.8665442547712162, 0.21707696784576438, 0.6874153343100409, 0.5605390608549168, 0.939007425912772, 0.9924558008465474, 0.9707453773384865, 0.9816567851283703, 0.605601765860542, -0.33189900608501827, -0…	(0.5536976828752779, 0.0, 0.8900169204737732, 0.8939641109298532, 0.894822006472492, 0.8976377952755906, 0.9010654490106544, 0.8847517730496454, 0.8989113530326595, 0.8996913580246914, 0.9010654490106544, 0.8996913580246914, 0.8996913580246914, 0.8956661316211878, 0.8946515397082657, 0.8984375, 0.9025487256371814, 0.8913043478260869, 0.8951612903225807, 0.8971518987341771, 0.9041297935103245, 0.9…
2	D	Aspartic_Acid	C([C@@H](C(=O)O)N)C(=O)[O-]	(0.6181527350386492, -1.0, 0.378, 0.8230088495575221)	(0.0, 0.0, 0.0, 0.0, 0.0, 0.0, 0.0, 0.0, 0.0, 0.0, 0.0, 0.0, 0.0, 0.0, 0.0, 0.0, 0.0, 0.0, 0.0, 0.0, 0.0, 0.0, 0.0, 0.0, 0.0, 0.0, 0.0, 0.0, 0.0, 0.0, 1.0, 0.0, 1.0, 0.0, 0.0, 0.0, 0.0, 0.0, 0.0, 0.0, 0.0, 0.0, 0.0, 0.0, 1.0, 0.0, 1.0, 0.0, 0.0, 0.0, 0.0, 0.0, 0.0, 0.0, 0.0, 0.0, 0.0, 0.0, 0.0, 0.0, 0.0, 0.0, 0.0, 1.0, 0.0, 0.0, 1.0, 0.0, 0.0, 0.0, 0.0, 0.0, 0.0, 0.0, 0.0, 0.0, 0.0, 0.0, 0.0, 0.0…	(0.0, 0.0, 1.0, 0.0, 0.0, 0.0, 0.0, 0.0, 0.0, 0.0, 0.0, 0.0, 0.0, 0.0, 0.0, 0.0, 0.0, 0.0, 0.0, 0.0)	3	5.58	0.378	-1	(0.25, 0.75, 0.9517766497461929, 1.0, 0.06559766763848396, 0.0, 1.0, 1.0, 0.0, 0.22129186602870812, 0.8454147670958335, 0.9871303924998289, 1.0, 0.9088257180832067, 0.572751789854619, 1.0, 0.8917666877237312, 0.9491006360472918, 0.9938867794436709, 0.9707453773384865, 0.9816567851283703, -0.09795836217656742, -0.9727444433086648, 0.9419811774431005, -0.8302483258854093, 0.0, 0.0, 0.56569231441429…	(0.6181527350386492, -1.0, 0.8984771573604061, 0.9021207177814029, 0.9029126213592233, 0.9055118110236221, 0.908675799086758, 0.8936170212765957, 0.906687402799378, 0.9074074074074073, 0.908675799086758, 0.9074074074074073, 0.9074074074074073, 0.9036918138041733, 0.9027552674230146, 0.9062499999999999, 0.9100449775112445, 0.8996655518394648, 0.9032258064516128, 0.9050632911392406, 0.9115044247787…
3	E	Glutamic_Acid	C(CC(=O)[O-])[C@@H](C(=O)O)N	(0.6933407170791736, -1.0, 0.459, 0.8731563421828908)	(0.0, 0.0, 0.0, 0.0, 0.0, 1.0, 0.0, 0.0, 0.0, 0.0, 0.0, 0.0, 0.0, 0.0, 0.0, 0.0, 0.0, 0.0, 0.0, 0.0, 0.0, 0.0, 0.0, 0.0, 0.0, 0.0, 0.0, 0.0, 0.0, 0.0, 0.0, 0.0, 1.0, 1.0, 0.0, 1.0, 0.0, 0.0, 0.0, 0.0, 0.0, 0.0, 0.0, 0.0, 1.0, 0.0, 0.0, 0.0, 0.0, 0.0, 0.0, 1.0, 0.0, 0.0, 0.0, 0.0, 0.0, 0.0, 0.0, 0.0, 0.0, 0.0, 0.0, 1.0, 0.0, 0.0, 1.0, 0.0, 0.0, 0.0, 0.0, 0.0, 0.0, 0.0, 0.0, 0.0, 0.0, 0.0, 0.0, 0.0…	(0.0, 0.0, 0.0, 1.0, 0.0, 0.0, 0.0, 0.0, 0.0, 0.0, 0.0, 0.0, 0.0, 0.0, 0.0, 0.0, 0.0, 0.0, 0.0, 0.0)	4	5.92	0.459	-1	(0.25, 0.49444444444444446, 0.8093626621545402, 0.6958092485549136, 1.0, 0.0, 0.85, 0.48474945533769054, 1.0, 0.22129186602870812, 0.7168482295565283, 0.7071754428370539, 0.6949439049716445, 0.8920766360541946, 0.870108997412795, 0.852794556285778, 1.0, 0.9404655223454681, 0.9785044550656511, 0.9938867794436709, 0.9816567851283703, 0.42646787656797297, -1.0, -0.2016360826040883, 0.860018077512649…	(0.6933407170791736, -1.0, 0.9272419627749577, 0.929853181076672, 0.93042071197411, 0.9322834645669291, 0.93455098934551, 0.9237588652482268, 0.9331259720062208, 0.9336419753086419, 0.93455098934551, 0.9336419753086419, 0.9336419753086419, 0.9309791332263242, 0.9303079416531606, 0.9328124999999999, 0.9355322338830585, 0.9280936454849498, 0.9306451612903225, 0.9319620253164558, 0.9365781710914454,…
4	F	Phenylalanine	C1=CC=C(C=C1)C[C@@H](C(=O)O)N	(0.7905478026821046, 0.0, 1.0, 0.9380530973451328)	(0.0, 1.0, 0.0, 0.0, 0.0, 0.0, 1.0, 0.0, 0.0, 1.0, 0.0, 0.0, 0.0, 0.0, 1.0, 0.0, 0.0, 0.0, 0.0, 0.0, 0.0, 0.0, 0.0, 0.0, 1.0, 0.0, 0.0, 0.0, 0.0, 1.0, 0.0, 0.0, 0.0, 0.0, 0.0, 0.0, 0.0, 0.0, 0.0, 0.0, 0.0, 1.0, 0.0, 0.0, 0.0, 0.0, 0.0, 0.0, 0.0, 1.0, 0.0, 0.0, 1.0, 0.0, 0.0, 0.0, 0.0, 0.0, 0.0, 0.0, 1.0, 0.0, 0.0, 1.0, 0.0, 0.0, 0.0, 0.0, 0.0, 0.0, 0.0, 0.0, 0.0, 0.0, 0.0, 0.0, 0.0, 0.0, 0.0, 0.0…	(0.0, 0.0, 0.0, 0.0, 1.0, 0.0, 0.0, 0.0, 0.0, 0.0, 0.0, 0.0, 0.0, 0.0, 0.0, 0.0, 0.0, 0.0, 0.0, 0.0)	5	6.36	1	0	(0.25, 0.6111111111111112, 0.7808798646362098, 0.5310693641618498, 0.5422740524781341, 0.3108912136054317, 0.5217391304347826, 0.4157218442932728, 0.22307692307692306, 0.0, 0.7003808389631639, 0.6380991351121634, 0.5559823808180636, 0.9611628355614484, 0.8970382277507907, 0.7307946968562292, 0.7217249245455182, 0.8870108526581614, 0.903521231868597, 0.933606710366056, 0.9708355993670302, 0.518193…	(0.7905478026821046, 0.0, 0.9644670050761421, 0.9657422512234909, 0.9660194174757283, 0.9669291338582678, 0.9680365296803654, 0.9627659574468084, 0.9673405909797824, 0.9675925925925924, 0.9680365296803654, 0.9675925925925924, 0.9675925925925924, 0.9662921348314606, 0.9659643435980552, 0.9671874999999999, 0.9685157421289355, 0.9648829431438126, 0.9661290322580646, 0.9667721518987342, 0.96902654867…
5	G	Glycine	C(C(=O)O)N	(0.3063907179654378, 0.0, 0.649, 0.663716814159292)	(0.0, 0.0, 0.0, 0.0, 0.0, 0.0, 0.0, 0.0, 0.0, 0.0, 0.0, 0.0, 0.0, 0.0, 0.0, 0.0, 0.0, 0.0, 0.0, 0.0, 0.0, 0.0, 0.0, 0.0, 0.0, 0.0, 0.0, 0.0, 0.0, 0.0, 0.0, 0.0, 0.0, 0.0, 0.0, 0.0, 0.0, 0.0, 0.0, 0.0, 0.0, 0.0, 0.0, 0.0, 0.0, 0.0, 0.0, 0.0, 0.0, 0.0, 0.0, 0.0, 0.0, 0.0, 0.0, 0.0, 1.0, 0.0, 0.0, 0.0, 0.0, 0.0, 0.0, 1.0, 0.0, 0.0, 0.0, 0.0, 0.0, 1.0, 0.0, 0.0, 0.0, 0.0, 0.0, 0.0, 0.0, 0.0, 0.0, 0.0…	(0.0, 0.0, 0.0, 0.0, 0.0, 1.0, 0.0, 0.0, 0.0, 0.0, 0.0, 0.0, 0.0, 0.0, 0.0, 0.0, 0.0, 0.0, 0.0, 0.0)	6	4.5	0.649	0	(0.25, 0.0, 0.16243654822335024, 0.008670520231213874, 0.0, 0.0, 0.6749999999999999, 0.0, 0.15909056300878663, 0.22129186602870812, 0.5627300113486483, 0.19834866248880068, 0.011958549873295343, 0.7625754296562154, 0.5720556247410368, 0.6011847888400536, 0.708693619588168, 1.0, 0.965487669067144, 0.9707453773384865, 0.9816567851283703, 0.5185917999518078, -0.4094881048119737, 0.14220983619155775,…	(0.3063907179654378, 0.0, 0.8071065989847714, 0.8140293637846655, 0.8155339805825244, 0.8204724409448819, 0.8264840182648401, 0.7978723404255318, 0.8227060653188181, 0.824074074074074, 0.8264840182648401, 0.824074074074074, 0.824074074074074, 0.8170144462279293, 0.8152350081037276, 0.8218749999999999, 0.8290854572713642, 0.8093645484949832, 0.8161290322580645, 0.8196202531645569, 0.83185840707964…
6	H	Histidine	C1=C(NC=N1)C[C@@H](C(=O)O)N	(0.736305201512343, 0.5, 0.514, 0.8967551622418879)	(0.0, 1.0, 1.0, 1.0, 0.0, 0.0, 0.0, 0.0, 0.0, 0.0, 0.0, 0.0, 0.0, 0.0, 0.0, 0.0, 0.0, 1.0, 0.0, 0.0, 1.0, 0.0, 0.0, 0.0, 0.0, 1.0, 0.0, 0.0, 1.0, 0.0, 0.0, 1.0, 0.0, 0.0, 0.0, 0.0, 0.0, 0.0, 0.0, 0.0, 0.0, 0.0, 0.0, 1.0, 0.0, 0.0, 0.0, 0.0, 0.0, 0.0, 0.0, 0.0, 1.0, 0.0, 0.0, 0.0, 0.0, 0.0, 0.0, 0.0, 0.0, 0.0, 0.0, 1.0, 0.0, 1.0, 0.0, 0.0, 0.0, 0.0, 0.0, 0.0, 0.0, 0.0, 0.0, 0.0, 0.0, 0.0, 1.0, 0.0…	(0.0, 0.0, 0.0, 0.0, 0.0, 0.0, 1.0, 0.0, 0.0, 0.0, 0.0, 0.0, 0.0, 0.0, 0.0, 0.0, 0.0, 0.0, 0.0, 0.0)	7	6.08	0.514	0.5	(0.25, 0.65, 0.7326565143824026, 0.5339595375722545, 0.5080174927113702, 0.04551220388971059, 0.6525, 0.5416666666666666, 0.32234432234432236, 0.0, 0.727288577299818, 0.7227158905172798, 0.7031988507449302, 0.9013969343134361, 0.7830494625184184, 0.8029618697278261, 0.7886702965035245, 0.9288459797413269, 0.9637418223220654, 0.9800188328373088, 0.9948627064932524, 0.38655870074053217, -0.47585570…	(0.736305201512343, 0.5, 0.9407783417935702, 0.9429037520391517, 0.9433656957928803, 0.9448818897637796, 0.9467275494672756, 0.9379432624113474, 0.9455676516329705, 0.9459876543209875, 0.9467275494672756, 0.9459876543209875, 0.9459876543209875, 0.9438202247191011, 0.9432739059967585, 0.9453124999999999, 0.9475262368815592, 0.9414715719063544, 0.9435483870967741, 0.944620253164557, 0.9483775811209…
7	I	Isoleucine	CC[C@H](C)[C@@H](C(=O)O)N	(0.6079483409937011, 0.0, 0.973, 0.911504424778761)	(0.0, 0.0, 0.0, 0.0, 0.0, 0.0, 0.0, 0.0, 0.0, 0.0, 0.0, 0.0, 0.0, 0.0, 0.0, 0.0, 0.0, 0.0, 0.0, 0.0, 0.0, 0.0, 0.0, 1.0, 0.0, 0.0, 0.0, 0.0, 0.0, 0.0, 0.0, 0.0, 0.0, 0.0, 1.0, 0.0, 0.0, 0.0, 0.0, 0.0, 0.0, 0.0, 0.0, 0.0, 0.0, 0.0, 0.0, 0.0, 0.0, 0.0, 0.0, 1.0, 0.0, 0.0, 0.0, 0.0, 0.0, 0.0, 0.0, 0.0, 0.0, 0.0, 0.0, 1.0, 1.0, 0.0, 0.0, 0.0, 0.0, 0.0, 0.0, 0.0, 0.0, 0.0, 0.0, 0.0, 1.0, 0.0, 0.0, 0.0…	(0.0, 0.0, 0.0, 0.0, 0.0, 0.0, 0.0, 1.0, 0.0, 0.0, 0.0, 0.0, 0.0, 0.0, 0.0, 0.0, 0.0, 0.0, 0.0, 0.0)	8	6.18	0.973	0	(0.25, 0.2222222222222222, 0.8705583756345178, 0.6091040462427747, 0.22740524781341107, 0.0, 0.375, 0.13468013468013468, 0.0, 0.22129186602870812, 0.5782926490153547, 0.47636483196593193, 0.17481598558538153, 0.791911900282457, 0.36809077648531024, 0.7248203910535025, 0.675194777847968, 0.9161237613057839, 0.983452527055752, 0.9924558008465472, 0.9816567851283703, 0.6176845368445157, -0.362032601…	(0.6079483409937011, 0.0, 0.9492385786802029, 0.9510603588907014, 0.9514563106796117, 0.952755905511811, 0.9543378995433789, 0.9468085106382977, 0.9533437013996889, 0.9537037037037036, 0.9543378995433789, 0.9537037037037036, 0.9537037037037036, 0.9518459069020866, 0.9513776337115072, 0.9531249999999999, 0.9550224887556221, 0.9498327759197324, 0.9516129032258065, 0.9525316455696201, 0.955752212389…
8	K	Lysine	C(CC[NH3+])C[C@@H](C(=O)O)N	(0.6885070850120881, 1.0, 0.514, 0.9380530973451328)	(0.0, 0.0, 0.0, 0.0, 1.0, 0.0, 0.0, 0.0, 0.0, 0.0, 0.0, 0.0, 0.0, 1.0, 0.0, 1.0, 0.0, 0.0, 0.0, 0.0, 0.0, 0.0, 0.0, 0.0, 0.0, 0.0, 0.0, 0.0, 0.0, 0.0, 0.0, 0.0, 0.0, 0.0, 0.0, 0.0, 0.0, 0.0, 1.0, 0.0, 0.0, 0.0, 0.0, 0.0, 0.0, 0.0, 0.0, 0.0, 0.0, 0.0, 0.0, 1.0, 0.0, 0.0, 0.0, 0.0, 0.0, 0.0, 0.0, 1.0, 0.0, 0.0, 1.0, 1.0, 0.0, 0.0, 0.0, 0.0, 0.0, 0.0, 0.0, 0.0, 0.0, 0.0, 0.0, 0.0, 0.0, 0.0, 0.0, 0.0…	(0.0, 0.0, 0.0, 0.0, 0.0, 0.0, 0.0, 0.0, 1.0, 0.0, 0.0, 0.0, 0.0, 0.0, 0.0, 0.0, 0.0, 0.0, 0.0, 0.0)	9	6.36	0.514	1	(0.5, 0.24444444444444444, 0.7335025380710659, 0.45592485549132966, 0.40524781341107874, 0.6862083118504044, 0.336, 0.14814814814814814, 0.0675990675990676, 0.0, 0.4652394503400185, 0.44188676340866134, 0.3048167365338351, 0.7657108013068031, 0.6585343406388201, 0.7176502267081284, 0.6928542851126552, 0.9450926858663452, 0.9480218836132949, 0.9842980209513893, 1.0, 0.9810151502230942, -0.38427409…	(0.6885070850120881, 1.0, 0.9644670050761421, 0.9657422512234909, 0.9660194174757283, 0.9669291338582678, 0.9680365296803654, 0.9627659574468084, 0.9673405909797824, 0.9675925925925924, 0.9680365296803654, 0.9675925925925924, 0.9675925925925924, 0.9662921348314606, 0.9659643435980552, 0.9671874999999999, 0.9685157421289355, 0.9648829431438126, 0.9661290322580646, 0.9667721518987342, 0.96902654867…
9	L	Leucine	CC(C)C[C@@H](C(=O)O)N	(0.6079483409937011, 0.0, 0.973, 0.911504424778761)	(0.0, 0.0, 0.0, 0.0, 0.0, 0.0, 0.0, 0.0, 0.0, 0.0, 0.0, 0.0, 0.0, 0.0, 0.0, 0.0, 1.0, 0.0, 0.0, 0.0, 0.0, 0.0, 0.0, 0.0, 0.0, 0.0, 0.0, 0.0, 0.0, 0.0, 0.0, 0.0, 0.0, 0.0, 0.0, 0.0, 0.0, 0.0, 0.0, 0.0, 0.0, 0.0, 0.0, 0.0, 0.0, 0.0, 0.0, 0.0, 0.0, 0.0, 1.0, 1.0, 0.0, 0.0, 0.0, 0.0, 0.0, 0.0, 0.0, 0.0, 0.0, 0.0, 0.0, 1.0, 0.0, 0.0, 0.0, 0.0, 0.0, 0.0, 0.0, 0.0, 0.0, 0.0, 0.0, 1.0, 1.0, 0.0, 0.0, 0.0…	(0.0, 0.0, 0.0, 0.0, 0.0, 0.0, 0.0, 0.0, 0.0, 1.0, 0.0, 0.0, 0.0, 0.0, 0.0, 0.0, 0.0, 0.0, 0.0, 0.0)	10	6.18	0.973	0	(0.25, 0.2611111111111111, 0.7351945854483923, 0.5216763005780348, 0.41545189504373176, 0.0, 0.375, 0.15824915824915822, 0.0, 0.22129186602870812, 0.5051889759424516, 0.4191703275307778, 0.34669371980282254, 0.7919119002824572, 0.41842871269849224, 0.7435101416832737, 0.713413350178985, 0.9157595216677569, 0.9804514357921533, 0.9924558008465472, 0.9816567851283703, 0.5610751841289161, -0.42107032…	(0.6079483409937011, 0.0, 0.9492385786802029, 0.9510603588907014, 0.9514563106796117, 0.952755905511811, 0.9543378995433789, 0.9468085106382977, 0.9533437013996889, 0.9537037037037036, 0.9543378995433789, 0.9537037037037036, 0.9537037037037036, 0.9518459069020866, 0.9513776337115072, 0.9531249999999999, 0.9550224887556221, 0.9498327759197324, 0.9516129032258065, 0.9525316455696201, 0.955752212389…
10	M	Methionine	CSCC[C@@H](C(=O)O)N	(0.7046188338157655, 0.0, 0.838, 0.911504424778761)	(0.0, 0.0, 0.0, 0.0, 0.0, 0.0, 0.0, 0.0, 0.0, 0.0, 0.0, 0.0, 0.0, 0.0, 0.0, 0.0, 0.0, 0.0, 0.0, 1.0, 0.0, 0.0, 0.0, 0.0, 0.0, 0.0, 0.0, 0.0, 0.0, 0.0, 0.0, 0.0, 0.0, 0.0, 0.0, 0.0, 1.0, 0.0, 0.0, 0.0, 0.0, 0.0, 0.0, 0.0, 0.0, 0.0, 0.0, 0.0, 1.0, 0.0, 0.0, 1.0, 0.0, 0.0, 1.0, 0.0, 0.0, 0.0, 0.0, 0.0, 0.0, 0.0, 0.0, 1.0, 0.0, 0.0, 0.0, 0.0, 0.0, 0.0, 0.0, 0.0, 0.0, 0.0, 0.0, 0.0, 0.0, 0.0, 0.0, 0.0…	(0.0, 0.0, 0.0, 0.0, 0.0, 0.0, 0.0, 0.0, 0.0, 0.0, 1.0, 0.0, 0.0, 0.0, 0.0, 0.0, 0.0, 0.0, 0.0, 0.0)	11	6.18	0.838	0	(0.25, 0.1648148148148148, 0.6082283637275177, 0.29720616570327557, 0.2302397149335925, 0.1365366116691318, 0.39166666666666666, 0.13734567901234565, 0.052884615384615384, 0.0, 0.7303940150436824, 0.7318818807724855, 0.6259171720265877, 0.8612915720228769, 0.7558272624268728, 0.718719070619477, 0.6864142451042324, 0.9127494090430512, 0.9159787293857667, 0.9799897294439072, 0.994862706493252, 0.57…	(0.7046188338157655, 0.0, 0.9492385786802029, 0.9510603588907014, 0.9514563106796117, 0.952755905511811, 0.9543378995433789, 0.9468085106382977, 0.9533437013996889, 0.9537037037037036, 0.9543378995433789, 0.9537037037037036, 0.9537037037037036, 0.9518459069020866, 0.9513776337115072, 0.9531249999999999, 0.9550224887556221, 0.9498327759197324, 0.9516129032258065, 0.9525316455696201, 0.955752212389…
11	N	Asparagine	C([C@@H](C(=O)O)N)C(=O)N	(0.6127819730607865, 0.0, 0.432, 0.8377581120943952)	(0.0, 0.0, 0.0, 0.0, 0.0, 0.0, 0.0, 0.0, 0.0, 0.0, 0.0, 0.0, 0.0, 0.0, 0.0, 0.0, 0.0, 0.0, 0.0, 0.0, 0.0, 0.0, 0.0, 0.0, 0.0, 0.0, 0.0, 0.0, 0.0, 0.0, 0.0, 0.0, 0.0, 0.0, 0.0, 0.0, 0.0, 0.0, 0.0, 0.0, 0.0, 0.0, 0.0, 0.0, 0.0, 1.0, 0.0, 0.0, 0.0, 0.0, 0.0, 1.0, 0.0, 0.0, 0.0, 0.0, 0.0, 0.0, 1.0, 0.0, 0.0, 0.0, 0.0, 1.0, 0.0, 0.0, 0.0, 0.0, 0.0, 0.0, 0.0, 0.0, 0.0, 0.0, 0.0, 0.0, 0.0, 0.0, 0.0, 0.0…	(0.0, 0.0, 0.0, 0.0, 0.0, 0.0, 0.0, 0.0, 0.0, 0.0, 0.0, 1.0, 0.0, 0.0, 0.0, 0.0, 0.0, 0.0, 0.0, 0.0)	12	5.68	0.432	0	(0.25, 0.5944444444444444, 0.8502538071065988, 0.7976878612716766, 0.17930029154518948, 0.0, 0.7058823529411763, 0.6391875746714456, 0.0, 0.22129186602870812, 0.7549044404098577, 0.7818814083012058, 0.6759895584797374, 0.8401442443934479, 0.43394052831930763, 0.8756665694429078, 0.7483196462413139, 0.9538583203793716, 1.0, 0.9924558008465474, 0.9816567851283703, 0.09395087191561852, -0.6246183158…	(0.6127819730607865, 0.0, 0.9069373942470388, 0.9102773246329526, 0.9110032362459547, 0.9133858267716536, 0.9162861491628614, 0.9024822695035459, 0.9144634525660964, 0.9151234567901233, 0.9162861491628614, 0.9151234567901233, 0.9151234567901233, 0.9117174959871588, 0.9108589951377632, 0.9140624999999999, 0.9175412293853072, 0.9080267558528426, 0.9112903225806452, 0.9129746835443037, 0.91887905604…
12	P	Proline	C1C[C@H](NC1)C(=O)O	(0.5215896681987402, 0.0, 1.0, 0.8200589970501474)	(0.0, 0.0, 0.0, 0.0, 0.0, 0.0, 0.0, 0.0, 0.0, 0.0, 0.0, 1.0, 0.0, 0.0, 0.0, 0.0, 0.0, 0.0, 0.0, 0.0, 0.0, 0.0, 0.0, 0.0, 0.0, 0.0, 0.0, 0.0, 0.0, 0.0, 0.0, 0.0, 0.0, 0.0, 0.0, 0.0, 0.0, 1.0, 0.0, 0.0, 0.0, 0.0, 0.0, 0.0, 0.0, 0.0, 0.0, 0.0, 0.0, 0.0, 0.0, 1.0, 0.0, 0.0, 0.0, 0.0, 0.0, 1.0, 0.0, 0.0, 0.0, 0.0, 0.0, 0.0, 0.0, 0.0, 0.0, 0.0, 0.0, 0.0, 0.0, 0.0, 0.0, 0.0, 0.0, 0.0, 0.0, 0.0, 0.0, 0.0…	(0.0, 0.0, 0.0, 0.0, 0.0, 0.0, 0.0, 0.0, 0.0, 0.0, 0.0, 0.0, 1.0, 0.0, 0.0, 0.0, 0.0, 0.0, 0.0, 0.0)	13	5.56	1	0	(0.25, 0.24444444444444444, 0.5160744500846024, 0.2514450867052024, 0.017492711370262388, 0.0, 0.5029411764705882, 0.28097062579821197, 0.0, 0.22129186602870812, 0.47216798094422585, 0.5658439948824856, 0.14148577955250025, 0.8608551221942525, 0.21707696784576438, 0.8324097076246894, 0.5605390608549168, 0.9462738762746032, 0.9924558008465474, 0.9707453773384865, 0.9816567851283703, 0.487283802739…	(0.5215896681987402, 0.0, 0.8967851099830795, 0.9004893964110928, 0.9012944983818771, 0.9039370078740159, 0.9071537290715372, 0.8918439716312054, 0.9051321928460343, 0.905864197530864, 0.9071537290715372, 0.905864197530864, 0.905864197530864, 0.9020866773675761, 0.9011345218800648, 0.9046874999999999, 0.9085457271364318, 0.8979933110367891, 0.9016129032258065, 0.9034810126582278, 0.91002949852507…
13	Q	Glutamine	C(CC(=O)N)[C@@H](C(=O)O)N	(0.6879699551013109, 0.0, 0.514, 0.8879056047197639)	(0.0, 0.0, 0.0, 0.0, 0.0, 0.0, 0.0, 0.0, 0.0, 0.0, 1.0, 0.0, 0.0, 0.0, 0.0, 0.0, 0.0, 0.0, 0.0, 0.0, 0.0, 0.0, 0.0, 0.0, 0.0, 0.0, 0.0, 0.0, 0.0, 0.0, 0.0, 0.0, 0.0, 0.0, 0.0, 0.0, 0.0, 0.0, 0.0, 0.0, 0.0, 0.0, 0.0, 0.0, 0.0, 1.0, 0.0, 0.0, 0.0, 0.0, 0.0, 1.0, 0.0, 0.0, 0.0, 0.0, 0.0, 0.0, 0.0, 0.0, 0.0, 0.0, 0.0, 1.0, 0.0, 0.0, 0.0, 0.0, 0.0, 0.0, 0.0, 0.0, 0.0, 0.0, 0.0, 0.0, 0.0, 0.0, 0.0, 1.0…	(0.0, 0.0, 0.0, 0.0, 0.0, 0.0, 0.0, 0.0, 0.0, 0.0, 0.0, 0.0, 0.0, 1.0, 0.0, 0.0, 0.0, 0.0, 0.0, 0.0)	14	6.02	0.514	0	(0.25, 0.42777777777777776, 0.7772137619853355, 0.6091040462427747, 0.7959183673469389, 0.09102440777942122, 0.6149999999999999, 0.35648148148148145, 0.44796380090497734, 0.0, 0.6579774050212905, 0.6012440001648506, 0.5407900983638739, 0.8360026668448202, 0.7690746110032449, 0.7920806618475588, 0.8465720337408493, 0.9450260946732278, 0.9871285695235752, 1.0, 0.9948627064932524, 0.4564113909909988…	(0.6879699551013109, 0.0, 0.9357021996615904, 0.9380097879282218, 0.9385113268608415, 0.9401574803149606, 0.9421613394216133, 0.9326241134751772, 0.9409020217729394, 0.9413580246913579, 0.9421613394216133, 0.9413580246913579, 0.9413580246913579, 0.9390048154093097, 0.9384116693679091, 0.9406249999999999, 0.9430284857571213, 0.9364548494983276, 0.9387096774193548, 0.9398734177215189, 0.94395280235…
14	R	Arginine	C(C[C@@H](C(=O)O)N)CN(C(N)=[NH2+])	(0.8388830490931367, 1.0, 0.0, 0.9675516224188789)	(0.0, 0.0, 0.0, 0.0, 1.0, 0.0, 0.0, 0.0, 0.0, 0.0, 0.0, 0.0, 0.0, 0.0, 0.0, 0.0, 0.0, 0.0, 0.0, 0.0, 0.0, 0.0, 0.0, 0.0, 0.0, 0.0, 1.0, 0.0, 0.0, 0.0, 0.0, 0.0, 0.0, 0.0, 0.0, 0.0, 0.0, 0.0, 1.0, 1.0, 1.0, 0.0, 0.0, 0.0, 0.0, 0.0, 0.0, 1.0, 0.0, 0.0, 0.0, 1.0, 0.0, 0.0, 0.0, 0.0, 0.0, 0.0, 0.0, 1.0, 0.0, 0.0, 0.0, 1.0, 0.0, 0.0, 0.0, 1.0, 0.0, 0.0, 0.0, 1.0, 0.0, 1.0, 0.0, 0.0, 0.0, 0.0, 0.0, 0.0…	(0.0, 0.0, 0.0, 0.0, 0.0, 0.0, 0.0, 0.0, 0.0, 0.0, 0.0, 0.0, 0.0, 0.0, 1.0, 0.0, 0.0, 0.0, 0.0, 0.0)	15	6.56	0	1	(1.0, 0.36666666666666664, 0.868866328257191, 0.5869460500963392, 0.5515063168124391, 1.0, 0.4222222222222222, 0.20036429872495445, 0.1715976331360947, 0.45454545454545453, 0.5640251424105502, 0.5093102874035927, 0.366843091516447, 0.7764151240762339, 0.7255251359911992, 0.7380112172749853, 0.7125313831251923, 0.9650388541806659, 0.9610354707240328, 0.9545000086578552, 0.9936023362637737, -1.0, 0…	(0.8388830490931367, 1.0, 0.9813874788494077, 0.9820554649265903, 0.982200647249191, 0.9826771653543308, 0.9832572298325722, 0.980496453900709, 0.9828926905132194, 0.9830246913580245, 0.9832572298325722, 0.9830246913580245, 0.9830246913580245, 0.9823434991974316, 0.9821717990275526, 0.9828124999999999, 0.9835082458770614, 0.9816053511705684, 0.982258064516129, 0.9825949367088607, 0.98377581120943…
15	S	Serine	C([C@@H](C(=O)O)N)O	(0.4676693449754451, 0.0, 0.595, 0.7640117994100294)	(1.0, 0.0, 0.0, 0.0, 0.0, 0.0, 0.0, 0.0, 0.0, 0.0, 0.0, 0.0, 0.0, 0.0, 0.0, 0.0, 0.0, 0.0, 0.0, 0.0, 0.0, 0.0, 0.0, 0.0, 0.0, 0.0, 0.0, 0.0, 0.0, 0.0, 0.0, 0.0, 0.0, 0.0, 0.0, 0.0, 0.0, 0.0, 0.0, 0.0, 0.0, 0.0, 0.0, 0.0, 0.0, 0.0, 0.0, 0.0, 0.0, 0.0, 0.0, 0.0, 0.0, 1.0, 0.0, 0.0, 0.0, 0.0, 0.0, 0.0, 0.0, 0.0, 0.0, 1.0, 0.0, 0.0, 0.0, 0.0, 0.0, 0.0, 0.0, 0.0, 1.0, 0.0, 0.0, 0.0, 0.0, 0.0, 0.0, 0.0…	(0.0, 0.0, 0.0, 0.0, 0.0, 0.0, 0.0, 0.0, 0.0, 0.0, 0.0, 0.0, 0.0, 0.0, 0.0, 1.0, 0.0, 0.0, 0.0, 0.0)	16	5.18	0.595	0	(0.25, 0.3055555555555556, 0.8079526226734348, 0.10838150289017343, 0.004373177842565597, 0.0, 0.6642857142857143, 0.4629629629629629, 0.0, 0.22129186602870812, 0.7689363310430382, 0.5725539844558988, 0.07124116268763743, 0.7934279937782996, 0.21707696784576438, 0.71959997452067, 0.5605390608549168, 0.966422409839205, 0.9924558008465474, 0.9707453773384865, 0.9816567851283703, 0.5961457297975986,…	(0.4676693449754451, 0.0, 0.8646362098138747, 0.8694942903752039, 0.8705501618122977, 0.8740157480314961, 0.8782343987823439, 0.8581560283687942, 0.8755832037325039, 0.8765432098765431, 0.8782343987823439, 0.8765432098765431, 0.8765432098765431, 0.871589085072231, 0.8703403565640193, 0.8749999999999999, 0.8800599700149924, 0.866220735785953, 0.8709677419354839, 0.8734177215189872, 0.8820058997050…
16	T	Threonine	C[C@H]([C@@H](C(=O)O)N)O	(0.5429647529981249, 0.0, 0.676, 0.8289085545722714)	(1.0, 0.0, 0.0, 0.0, 0.0, 0.0, 0.0, 0.0, 0.0, 0.0, 0.0, 0.0, 0.0, 0.0, 0.0, 0.0, 0.0, 0.0, 0.0, 0.0, 0.0, 0.0, 0.0, 0.0, 0.0, 0.0, 0.0, 0.0, 0.0, 0.0, 0.0, 0.0, 0.0, 0.0, 0.0, 0.0, 0.0, 0.0, 0.0, 0.0, 0.0, 0.0, 0.0, 0.0, 0.0, 0.0, 0.0, 0.0, 0.0, 0.0, 0.0, 0.0, 0.0, 0.0, 0.0, 0.0, 0.0, 0.0, 0.0, 0.0, 0.0, 0.0, 0.0, 1.0, 0.0, 0.0, 0.0, 0.0, 0.0, 0.0, 0.0, 0.0, 0.0, 0.0, 0.0, 0.0, 1.0, 0.0, 0.0, 0.0…	(0.0, 0.0, 0.0, 0.0, 0.0, 0.0, 0.0, 0.0, 0.0, 0.0, 0.0, 0.0, 0.0, 0.0, 0.0, 0.0, 1.0, 0.0, 0.0, 0.0)	17	5.62	0.676	0	(0.25, 0.36666666666666664, 1.0, 0.3078034682080925, 0.017492711370262388, 0.0, 0.5735294117647058, 0.35947712418300654, 0.0, 0.22129186602870812, 0.7278872761410419, 0.6028763780206623, 0.09439503487948409, 0.7972691674296444, 0.21707696784576438, 0.7573366820452622, 0.5605390608549168, 0.9473275376562864, 0.9924558008465474, 0.9707453773384865, 0.9816567851283703, 0.4872065632912992, -0.0195264…	(0.5429647529981249, 0.0, 0.9018612521150592, 0.9053833605220228, 0.9061488673139159, 0.9086614173228347, 0.9117199391171994, 0.8971631205673759, 0.9097978227060654, 0.9104938271604939, 0.9117199391171994, 0.9104938271604939, 0.9104938271604939, 0.9069020866773676, 0.905996758508914, 0.909375, 0.9130434782608695, 0.903010033444816, 0.9064516129032258, 0.9082278481012658, 0.9144542772861357, 0.912…
17	V	Valine	CC(C)[C@@H](C(=O)O)N	(0.5320620900691662, 0.0, 0.892, 0.8643067846607669)	(0.0, 0.0, 0.0, 0.0, 0.0, 0.0, 0.0, 0.0, 0.0, 0.0, 0.0, 0.0, 0.0, 0.0, 0.0, 0.0, 0.0, 0.0, 0.0, 0.0, 0.0, 0.0, 0.0, 0.0, 0.0, 0.0, 0.0, 0.0, 0.0, 0.0, 0.0, 0.0, 0.0, 0.0, 0.0, 0.0, 0.0, 0.0, 0.0, 0.0, 0.0, 0.0, 0.0, 0.0, 0.0, 0.0, 0.0, 0.0, 0.0, 0.0, 0.0, 0.0, 0.0, 0.0, 0.0, 0.0, 0.0, 0.0, 0.0, 0.0, 0.0, 0.0, 0.0, 1.0, 1.0, 0.0, 0.0, 0.0, 0.0, 0.0, 0.0, 0.0, 0.0, 0.0, 0.0, 0.0, 1.0, 0.0, 0.0, 0.0…	(0.0, 0.0, 0.0, 0.0, 0.0, 0.0, 0.0, 0.0, 0.0, 0.0, 0.0, 0.0, 0.0, 0.0, 0.0, 0.0, 0.0, 1.0, 0.0, 0.0)	18	5.86	0.892	0	(0.25, 0.12222222222222222, 0.793570219966159, 0.4205202312138729, 0.026239067055393583, 0.0, 0.4184210526315789, 0.08856682769726247, 0.0, 0.22129186602870812, 0.5979467854065631, 0.4175134166526112, 0.09455321675611494, 0.7882448414541767, 0.21707696784576438, 0.7538367258182487, 0.5605390608549168, 0.9161476757485972, 0.9924558008465472, 0.9707453773384865, 0.9816567851283703, 0.62709050407421…	(0.5320620900691662, 0.0, 0.922165820642978, 0.9249592169657421, 0.9255663430420713, 0.9275590551181104, 0.9299847792998478, 0.9184397163120566, 0.9284603421461899, 0.9290123456790123, 0.9299847792998478, 0.9290123456790123, 0.9290123456790123, 0.9261637239165328, 0.9254457050243112, 0.9281249999999999, 0.9310344827586207, 0.9230769230769229, 0.9258064516129032, 0.9272151898734178, 0.932153392330…
18	W	Tryptophan	C1=CC=C2C(=C1)C(=CN2)C[C@@H](C(=O)O)N	(1.0, 0.0, 0.946, 1.0)	(0.0, 1.0, 1.0, 0.0, 0.0, 0.0, 0.0, 1.0, 1.0, 0.0, 0.0, 0.0, 1.0, 0.0, 0.0, 0.0, 0.0, 0.0, 0.0, 0.0, 0.0, 1.0, 1.0, 0.0, 1.0, 0.0, 0.0, 0.0, 0.0, 0.0, 0.0, 0.0, 0.0, 0.0, 0.0, 0.0, 0.0, 0.0, 0.0, 0.0, 0.0, 1.0, 1.0, 0.0, 0.0, 0.0, 0.0, 0.0, 0.0, 0.0, 0.0, 0.0, 1.0, 0.0, 0.0, 0.0, 0.0, 0.0, 0.0, 0.0, 0.0, 0.0, 0.0, 1.0, 0.0, 0.0, 0.0, 0.0, 0.0, 0.0, 1.0, 0.0, 0.0, 0.0, 1.0, 0.0, 0.0, 1.0, 0.0, 0.0…	(0.0, 0.0, 0.0, 0.0, 0.0, 0.0, 0.0, 0.0, 0.0, 0.0, 0.0, 0.0, 0.0, 0.0, 0.0, 0.0, 0.0, 0.0, 1.0, 0.0)	19	6.78	0.946	0	(0.25, 1.0, 0.9737732656514384, 0.6659441233140657, 0.7390670553935862, 0.8134563569037806, 0.5777777777777777, 0.5376344086021505, 0.3076923076923077, 0.31578947368421056, 0.8309732511935695, 0.7929395466954502, 0.5689696813054179, 1.0, 1.0, 0.7350513567743169, 0.7238258237964418, 0.8777528051391931, 0.8997601713552282, 0.9112136142593723, 0.9358708950895116, 0.6723783361900264, -0.6202390554506…	(1.0, 0.0, 1.0, 1.0, 1.0, 1.0, 1.0, 1.0, 1.0, 1.0, 1.0, 1.0, 1.0, 1.0, 1.0, 1.0, 1.0, 1.0, 1.0, 1.0, 1.0, 1.0, 0.96878612716763, 0.9661442006269593, 0.9608127721335267, 0.9629883481836874, 0.973, 0.9672528805336568, 0.964332892998679, 0.9726305119107959, 0.964332892998679, 0.9726305119107959, 0.9706202393906419, 0.9622905027932961, 0.973, 0.964332892998679, 0.946, 0.9661442006269593, 0.9677804295…
19	Y	Tyrosine	C1=CC(=CC=C1C[C@@H](C(=O)O)N)O	(0.8764767715484434, 0.0, 0.865, 0.9528023598820059)	(1.0, 1.0, 0.0, 0.0, 0.0, 0.0, 0.0, 0.0, 0.0, 1.0, 0.0, 0.0, 0.0, 0.0, 0.0, 1.0, 0.0, 0.0, 1.0, 0.0, 0.0, 0.0, 0.0, 0.0, 1.0, 0.0, 0.0, 1.0, 0.0, 1.0, 0.0, 0.0, 0.0, 0.0, 0.0, 0.0, 0.0, 0.0, 0.0, 0.0, 0.0, 0.0, 0.0, 0.0, 0.0, 0.0, 0.0, 0.0, 0.0, 0.0, 0.0, 0.0, 1.0, 0.0, 0.0, 1.0, 0.0, 0.0, 0.0, 0.0, 0.0, 1.0, 0.0, 1.0, 0.0, 0.0, 0.0, 0.0, 1.0, 0.0, 0.0, 0.0, 0.0, 0.0, 0.0, 0.0, 0.0, 0.0, 0.0, 0.0…	(0.0, 0.0, 0.0, 0.0, 0.0, 0.0, 0.0, 0.0, 0.0, 0.0, 0.0, 0.0, 0.0, 0.0, 0.0, 0.0, 0.0, 0.0, 0.0, 1.0)	20	6.46	0.865	0	(0.25, 0.7333333333333333, 0.9018612521150591, 0.5746628131021195, 0.6120019436345967, 0.4429965661697883, 0.6, 0.46121593291404606, 0.2704714640198511, 1.0, 0.7837808483320935, 0.6667608257193065, 0.5714234087699009, 0.9631828129320359, 0.9592465610099706, 0.733215650678387, 0.752502394392028, 0.885707119542521, 0.9010159628260643, 0.9340634295626332, 0.9683573308268884, 0.5000440609022313, -0.5…	(0.8764767715484434, 0.0, 0.9729272419627749, 0.9738988580750407, 0.9741100323624595, 0.9748031496062992, 0.9756468797564688, 0.9716312056737588, 0.9751166407465007, 0.9753086419753086, 0.9756468797564688, 0.9753086419753086, 0.9753086419753086, 0.9743178170144462, 0.9740680713128038, 0.975, 0.9760119940029984, 0.9732441471571907, 0.9741935483870967, 0.9746835443037974, 0.976401179941003, 0.97583…
