# Supplementary material for: Featurization strategies for polymer sequence or composition design by machine learning
Source: Royal Society of Chemistry journal article supplement (doi:10.1039/d1me00160d), 2022-01-01
Supplement: d1me00160d2.csv [file d1me00160d2.csv]

Number Encoding	OHE	FF1 (condense)	FF1
0	(1.0, 0.0, 0.0, 0.0, 0.0, 0.0, 0.0, 0.0, 0.0, 0.0)	(0.5, 0, 0, 0, 0)	(0.5, 0.3162277638912201, 0.22360679507255554, 0.4472135901451111, 0.0, 0.0, 0.0, 0.0, 0.0, 0.0, 0.0, 0.0, 0.0, 0.0)
1	(0.0, 1.0, 0.0, 0.0, 0.0, 0.0, 0.0, 0.0, 0.0, 0.0)	(0.2, 0, 0, 0, 0)	(0.3160000145435333, 0.20000000298023224, 0.1414213627576828, 0.2828427255153656, 0.0, 0.0, 0.0, 0.0, 0.0, 0.0, 0.0, 0.0, 0.0, 0.0)
2	(0.0, 0.0, 1.0, 0.0, 0.0, 0.0, 0.0, 0.0, 0.0, 0.0)	(0.5, 0.1, 0, 1, 0)	(0.5, 0.3162277638912201, 0.22360679507255554, 0.4472135901451111, 0.22360679507255554, 0.1414213627576828, 0.10000000149011612, 0.20000000298023224, 0.0, 0.0, 0.0, 0.0, 1.0, 0.0)
3	(0.0, 0.0, 0.0, 1.0, 0.0, 0.0, 0.0, 0.0, 0.0, 0.0)	(0.2, 0.1, 0, 1, 0)	(0.3160000145435333, 0.20000000298023224, 0.1414213627576828, 0.2828427255153656, 0.22360679507255554, 0.1414213627576828, 0.10000000149011612, 0.20000000298023224, 0.0, 0.0, 0.0, 0.0, 1.0, 0.0)
4	(0.0, 0.0, 0.0, 0.0, 1.0, 0.0, 0.0, 0.0, 0.0, 0.0)	(0.5, 0.4, 0, 1, 0)	(0.5, 0.3162277638912201, 0.22360679507255554, 0.4472135901451111, 0.4472135901451111, 0.2828427255153656, 0.20000000298023224, 0.4000000059604645, 0.0, 0.0, 0.0, 0.0, 1.0, 0.0)
5	(0.0, 0.0, 0.0, 0.0, 0.0, 1.0, 0.0, 0.0, 0.0, 0.0)	(0.2, 0.4, 0, 1, 0)	(0.3160000145435333, 0.20000000298023224, 0.1414213627576828, 0.2828427255153656, 0.4472135901451111, 0.2828427255153656, 0.20000000298023224, 0.4000000059604645, 0.0, 0.0, 0.0, 0.0, 1.0, 0.0)
6	(0.0, 0.0, 0.0, 0.0, 0.0, 0.0, 1.0, 0.0, 0.0, 0.0)	(0.5, 0.1, 0.1, 1, 1)	(0.5, 0.3162277638912201, 0.22360679507255554, 0.4472135901451111, 0.22360679507255554, 0.1414213627576828, 0.10000000149011612, 0.20000000298023224, 0.22360679507255554, 0.1414213627576828, 0.10000000149011612, 0.20000000298023224, 1.0, 1.0)
7	(0.0, 0.0, 0.0, 0.0, 0.0, 0.0, 0.0, 1.0, 0.0, 0.0)	(0.2, 0.1, 0.1, 1, 1)	(0.3160000145435333, 0.20000000298023224, 0.1414213627576828, 0.2828427255153656, 0.22360679507255554, 0.1414213627576828, 0.10000000149011612, 0.20000000298023224, 0.22360679507255554, 0.1414213627576828, 0.10000000149011612, 0.20000000298023224, 1.0, 1.0)
8	(0.0, 0.0, 0.0, 0.0, 0.0, 0.0, 0.0, 0.0, 1.0, 0.0)	(0.5, 0.4, 0.4, 1, 1)	(0.5, 0.3162277638912201, 0.22360679507255554, 0.4472135901451111, 0.4472135901451111, 0.2828427255153656, 0.20000000298023224, 0.4000000059604645, 0.4472135901451111, 0.2828427255153656, 0.20000000298023224, 0.4000000059604645, 1.0, 1.0)
9	(0.0, 0.0, 0.0, 0.0, 0.0, 0.0, 0.0, 0.0, 0.0, 1.0)	(0.2, 0.4, 0.4, 1, 1)	(0.3160000145435333, 0.20000000298023224, 0.1414213627576828, 0.2828427255153656, 0.4472135901451111, 0.2828427255153656, 0.20000000298023224, 0.4000000059604645, 0.4472135901451111, 0.2828427255153656, 0.20000000298023224, 0.4000000059604645, 1.0, 1.0)
