# Supplementary material for: Featurization strategies for polymer sequence or composition design by machine learning
Source: Royal Society of Chemistry journal article supplement (doi:10.1039/d1me00160d), 2022-01-01
Supplement: d1me00160d3.csv [file d1me00160d3.csv]

Number Encoding	Name	SMILES	MFP	mordred	OHE
0	Trifluoroethyl acrylate	FC(F)(F)COC(=O)C=C	(0.0, 0.0, 1.0, 0.0, 0.0, 1.0, 1.0, 1.0, 0.0, 0.0, 0.0, 0.0, 0.0, 0.0, 1.0, 0.0, 0.0, 0.0, 1.0, 0.0, 0.0, 0.0, 0.0, 0.0, 0.0, 0.0, 1.0, 0.0, 1.0, 0.0, 0.0, 0.0, 1.0, 0.0, 0.0, 0.0, 0.0, 0.0, 0.0, 0.0, 0.0, 0.0, 0.0, 0.0, 0.0, 0.0, 0.0, 1.0, 0.0, 1.0, 0.0, 0.0, 0.0, 0.0, 0.0, 0.0, 0.0, 0.0, 1.0, 1.0, 0.0, 0.0, 0.0, 1.0, 1.0, 0.0)	(0.48560538480253024, -0.29239098401858804, -0.2491538011161397, -1.0, 0.0, 0.5094078607670989, -1.0, 1.0, 0.49746472757116855, -0.5460084512749223, -1.0, 0.7980050908547732, 1.0, -0.640175489067894, -0.2527179982343211, -0.3393089848329515, 1.0, -0.5045571154816703, -0.619965344021461, -0.3198753933767758, 0.3713749060013115, 1.0, 0.8709243683723985, 0.31834900602127736, 0.5512790500830224, 1.0,…	(1.0, 0.0, 0.0, 0.0, 0.0, 0.0)
1	HexaFOEA	C(=C)C(=O)OCCOC(C(F)(F)F)C(F)(F)F	(0.0, 0.0, 1.0, 1.0, 0.0, 0.0, 1.0, 1.0, 0.0, 0.0, 1.0, 0.0, 0.0, 0.0, 1.0, 0.0, 0.0, 1.0, 1.0, 1.0, 0.0, 0.0, 0.0, 0.0, 0.0, 0.0, 1.0, 0.0, 1.0, 1.0, 1.0, 1.0, 0.0, 1.0, 0.0, 0.0, 0.0, 0.0, 0.0, 0.0, 0.0, 0.0, 0.0, 0.0, 1.0, 0.0, 0.0, 0.0, 0.0, 1.0, 1.0, 1.0, 1.0, 1.0, 1.0, 0.0, 0.0, 0.0, 1.0, 1.0, 1.0, 0.0, 0.0, 1.0, 1.0, 0.0)	(0.6795361284567351, -0.4689499215672836, -0.6216850717149085, -0.3225581141547531, 1.0, 0.8822328888888888, -0.5211397058823531, -0.541134654818865, 1.0, -0.6544001875488402, -0.18786559483262008, -0.7545073290833608, 0.9028367629827004, -0.2750698668420185, -0.21904196187753458, -0.367496429046928, 0.41158242440622, -0.3041852131175484, -0.5464256393284174, -0.9296769970265233, 0.82897144662484…	(0.0, 1.0, 0.0, 0.0, 0.0, 0.0)
2	NonaFOEA	C(=C)C(=O)OCCOC(C(F)(F)F)(C(F)(F)F)C(F)(F)F	(0.0, 0.0, 1.0, 0.0, 0.0, 0.0, 1.0, 1.0, 0.0, 1.0, 0.0, 0.0, 0.0, 0.0, 1.0, 1.0, 0.0, 0.0, 1.0, 0.0, 1.0, 1.0, 0.0, 1.0, 0.0, 0.0, 1.0, 0.0, 1.0, 0.0, 0.0, 0.0, 0.0, 1.0, 1.0, 0.0, 0.0, 1.0, 0.0, 1.0, 0.0, 0.0, 1.0, 0.0, 1.0, 0.0, 1.0, 0.0, 0.0, 1.0, 1.0, 0.0, 1.0, 0.0, 0.0, 0.0, 0.0, 1.0, 1.0, 1.0, 0.0, 0.0, 0.0, 1.0, 1.0, 0.0)	(0.9849491657826055, 0.03747704404019193, -1.0, -0.4440543030755894, 0.6476129044126157, 0.3257491714634572, 0.5599505427170852, -0.8783765789917529, 0.6113202515943953, -0.8238329253295438, -0.007681174651415558, -1.0, 0.9819443438888027, -0.0035623266357835705, -0.330623588842423, -0.40093433591486327, -0.8361257540152682, 0.4823467444405762, -0.4773964165818587, -0.9388010879874745, 0.80277568…	(0.0, 0.0, 1.0, 0.0, 0.0, 0.0)
3	PEGA	OCCO.OC(=O)C=C	(1.0, 1.0, 0.0, 0.0, 1.0, 0.0, 0.0, 0.0, 0.0, 0.0, 0.0, 1.0, 0.0, 1.0, 0.0, 0.0, 0.0, 0.0, 0.0, 0.0, 0.0, 0.0, 0.0, 0.0, 0.0, 1.0, 0.0, 1.0, 0.0, 0.0, 0.0, 0.0, 0.0, 0.0, 0.0, 1.0, 0.0, 0.0, 0.0, 0.0, 1.0, 0.0, 0.0, 0.0, 0.0, 0.0, 0.0, 0.0, 0.0, 0.0, 0.0, 0.0, 0.0, 0.0, 0.0, 0.0, 0.0, 0.0, 0.0, 0.0, 0.0, 0.0, 1.0, 0.0, 0.0, 1.0)	(-0.2564309351630724, -1.0, 0.23650299594256277, 0.0, 0.0, 0.5094078607670989, -0.10095766757085683, 0.12796279263061666, 0.49746472757116855, -1.0, -0.09122320906623442, 0.4301277703344277, -0.050250868874957985, 0.6065400843881851, 1.0, -1.0, -0.061398052250947424, 1.0, -0.34287011883563184, -0.3198753933767758, 0.33074574219779906, 0.9062330623306232, 0.7134484264185771, 0.0, 0.551279050083022…	(0.0, 0.0, 0.0, 1.0, 0.0, 0.0)
4	HEA	C(=C)C(=O)OCCO	(0.0, 1.0, 0.0, 0.0, 0.0, 0.0, 1.0, 1.0, 1.0, 0.0, 0.0, 0.0, 1.0, 0.0, 1.0, 0.0, 0.0, 0.0, 1.0, 0.0, 0.0, 0.0, 0.0, 0.0, 0.0, 1.0, 1.0, 0.0, 1.0, 0.0, 0.0, 0.0, 0.0, 0.0, 0.0, 0.0, 0.0, 0.0, 0.0, 0.0, 0.0, 1.0, 0.0, 0.0, 0.0, 0.0, 0.0, 0.0, 0.0, 0.0, 0.0, 0.0, 0.0, 0.0, 0.0, 0.0, 1.0, 0.0, 1.0, 1.0, 0.0, 0.0, 0.0, 0.0, 1.0, 1.0)	(-0.13393581218068287, -0.5521573307874971, -0.659947057824018, -0.013812343119065812, 0.06337843025973156, 1.0, 0.37999770220588214, 0.13990943267259057, 0.49826349207071546, -0.4011470272206284, -0.06853773212836926, 0.1316955885698861, 0.670580186930213, -1.0, -0.5248390020791263, -0.534114444474153, 0.66017978629442, 0.24159820431039497, -1.0, 1.0, 0.3307299301852595, 0.6470130788264404, 0.66…	(0.0, 0.0, 0.0, 0.0, 1.0, 0.0)
5	MSEA	C(=C)C(=O)OCC[S@@](=O)C	(0.0, 0.0, 0.0, 0.0, 0.0, 0.0, 1.0, 1.0, 0.0, 0.0, 0.0, 0.0, 0.0, 0.0, 1.0, 0.0, 1.0, 0.0, 1.0, 0.0, 0.0, 0.0, 1.0, 0.0, 1.0, 0.0, 1.0, 0.0, 1.0, 0.0, 0.0, 0.0, 0.0, 0.0, 0.0, 0.0, 1.0, 0.0, 1.0, 0.0, 0.0, 0.0, 0.0, 1.0, 0.0, 1.0, 0.0, 0.0, 1.0, 0.0, 0.0, 0.0, 0.0, 0.0, 0.0, 1.0, 0.0, 0.0, 1.0, 1.0, 0.0, 1.0, 0.0, 0.0, 1.0, 0.0)	(-1.0, -0.5987294965408755, 0.4148927351304141, -0.1648101058605259, -0.09336816451892863, -0.17035061728395062, 0.3169504643962843, 0.9194157642911105, -0.11972483338043498, -0.04826826517322248, -0.7123343748840025, -0.11682340572820625, 0.9262131300321269, 0.19850402761795152, 0.17340696060920552, 0.14795344785700698, -0.6435391136126734, 0.44855821601515694, -0.7168786447591264, -0.4110234884…	(0.0, 0.0, 0.0, 0.0, 0.0, 1.0)
