# Supplementary material for: Featurization strategies for polymer sequence or composition design by machine learning
Source: Royal Society of Chemistry journal article supplement (doi:10.1039/d1me00160d), 2022-01-01
Supplement: d1me00160d4.csv [file d1me00160d4.csv]

Number Encoding	Letter Encoding	OHE	SP
0	A	(1, 0)	(1, 0.3, 2.5, 1.122)
1	B	(0, 1)	(0.3, 1, 1.122, 2.5)
