# Supplementary material for: Featurization strategies for polymer sequence or composition design by machine learning
Source: Royal Society of Chemistry journal article supplement (doi:10.1039/d1me00160d), 2022-01-01
Supplement: d1me00160d6.csv [file d1me00160d6.csv]

ROG (A)	CV (J/K)	TAUS (fs)
11.72591446	0.444603624	36585.162
11.91207916	0.370301671	40234.011
11.37504681	0.399938796	38123.675
11.45703845	0.407542328	34174.561
11.50996394	0.449729987	34279.74
12.863545	0.377657382	53720.478
11.3267321	0.433212546	34210.401
14.50438072	0.451138971	82130.004
11.16783148	0.409283848	30541.748
11.64732888	0.430067736	37728.078
11.434113	0.374969244	32044.786
11.41726675	0.408846121	34495.121
11.6317763	0.40428307	33979.517
11.19268511	0.402494997	29409.811
11.15508897	0.393982865	31114.922
11.38440161	0.396168222	32523.531
11.41250761	0.417228514	34655.533
11.4554642	0.437547595	33195.517
11.48213917	0.394747394	33936.279
11.33665647	0.459575994	32659.389
11.26470106	0.381728405	31415.685
12.02481143	0.383854855	46462.762
11.65391265	0.419566862	37683.044
11.46559288	0.40368505	36515.431
10.80147027	0.436976655	27547.088
11.59440296	0.408673408	35072.768
11.18577758	0.425985042	30616.51
10.84317804	0.419549421	27954.749
11.56701258	0.406078089	37926.223
11.28899863	0.409160951	30261.331
11.71867996	0.411407747	35002.167
11.52425746	0.410975914	37918.16
12.29054677	0.383101887	44585.54
11.56717208	0.384023232	35305.062
11.25180341	0.395682784	29456.294
11.62548537	0.391533406	35827.895
12.34000729	0.390401018	47292.331
11.60200328	0.3874929	36534.778
12.92354905	0.385423166	53469.644
11.82396042	0.389242869	37820.703
11.69630198	0.403657083	36568.708
11.35558541	0.400340549	30973.587
11.42600849	0.405744805	34595.543
11.09513993	0.507220624	28438.234
10.66635833	0.386625884	25173.717
12.70240056	0.375196205	44962.574
11.31157858	0.424962581	11721.002
11.6268749	0.37936146	36526.214
11.53002428	0.394374144	38438.517
11.95783509	0.382078281	41643.42
12.40972804	0.387285938	47607.056
13.17937707	0.398169511	57460.33
11.18747156	0.38972912	29610.958
11.86226117	0.391801771	37917.054
11.58027331	0.395836477	32964.947
11.58667252	0.388978353	36288.523
12.51988259	0.380800268	51388.985
11.01931123	0.411057651	27608.584
11.76028103	0.367619802	33531.838
11.40260365	0.445348022	34364.717
11.24665061	0.408010502	30298.516
11.52684562	0.412844408	34949.581
11.53941723	0.403277132	32427.321
11.38946443	0.384050336	31597.926
11.57803869	0.413208647	33407.345
12.55533472	0.379792798	45018.979
11.45986213	0.400008269	34085.406
11.27738844	0.395366916	32562.296
11.45789029	0.437932452	34832.75
11.27713306	0.398087508	29407.617
11.37166391	0.424323801	35647.962
11.62221192	0.456713715	35420.825
11.07126506	0.415506276	27552.867
12.22852894	0.370632069	42784.443
11.28203306	0.388570328	29580.667
12.05686112	0.37733343	42962.366
11.25560394	0.424864528	33258.141
11.45834412	0.39077892	34097.097
11.36717511	0.398352803	31928.425
10.92281328	0.423812789	29312.832
11.38620349	0.428937548	33763.94
11.68782401	0.400362137	36840.082
11.55738811	0.416394147	37426.204
11.69515883	0.436389635	33767.829
12.46669643	0.38865568	54517.121
11.10537437	0.429791618	32503.969
11.86474863	0.456641044	39916.874
11.39287892	0.408515129	35519.818
10.6733617	0.783185429	25218.306
10.75578449	0.725611984	25661.548
10.95273573	0.417180947	26182.688
12.30842273	0.372346235	44255.499
11.70818816	0.39609307	38893.959
11.76898211	0.401597289	40097.809
11.2010254	0.427139178	31900.406
11.73196787	0.505867337	32359.732
12.36871457	0.435200772	45892.935
11.3275187	0.440705958	29875.205
11.75274266	0.463522936	37371.957
12.77463033	0.410160055	51344.366
13.14927032	0.397303395	55659.886
11.8933246	0.418195365	37546.945
12.35553762	0.403034596	40050.464
11.61462914	0.490279878	33657.992
11.91100542	0.47384812	42138.885
11.39201694	0.473910872	30351.323
11.7121215	0.428383374	34722.733
11.75172413	0.452955428	37254.636
11.48637584	0.439333097	34384.335
12.63086933	0.392121911	46805.903
12.31597702	0.438449602	42910.486
11.78988677	0.440903872	35490.734
11.95505709	0.428209915	41222.158
11.4864912	0.657772034	31871.884
11.80827591	0.440854978	37139.272
11.85774599	0.408137006	36450.1
11.76702936	0.422426675	37383.748
11.66861131	0.420611637	35318.711
11.68947347	0.473245006	33747.937
11.55294984	0.434303479	31332.688
11.76648078	0.427853589	36631.35
12.88233248	0.404042516	53110.61
14.19239479	0.438354444	70995.769
11.6487583	0.451044939	35634.674
11.98444659	0.448306168	39866.71
11.6965029	0.444623803	36223.549
11.6515381	0.417417854	31171.843
11.66684105	0.447580348	34530.545
11.9874597	0.444729597	42150.412
11.99577009	0.463076152	40087.177
11.60724558	0.411391225	33788.767
13.23443539	0.402475515	51978.06
11.68994739	0.422444579	33440.145
11.55677031	0.617386583	34137.271
12.0502946	0.422636158	41364.913
13.19055306	0.406916157	60096.275
11.58854046	0.401102917	29535.419
11.91349403	0.438496607	38969.893
11.61090005	0.429573696	33692.19
11.61871421	0.522410188	32415.163
12.06567818	0.440890358	39972.173
11.70545258	0.420091501	37982.495
11.83809191	0.415768963	36073.418
12.63620473	0.404736475	50399.851
11.80404803	0.442035269	36659.825
11.67355087	0.407225822	34428.409
11.94663969	0.436238146	38677.495
11.64827069	0.450009844	35679.645
12.14281269	0.411991969	37601.693
11.42433149	0.455664223	32040.952
11.61697508	0.44191057	35582.024
11.76658107	0.443998566	37085.87
11.89769642	0.43067483	35707.428
11.51104513	0.564590428	36277.689
11.75474415	0.454328879	37245.793
11.96634531	0.409995697	36048.145
11.89422591	0.416454225	38428.262
11.92159763	0.469516635	38186.84
12.61578376	0.395150134	46882.71
12.43567851	0.408278726	44714.346
11.45069299	0.42979117	33231.477
11.67489786	0.449987544	37037.853
11.74810197	0.435263208	36862.775
15.17081507	0.478512149	93636.777
11.90353519	0.402397388	34792.923
11.77686418	0.478996843	40242.038
12.21057574	0.432155402	41365.801
11.74610744	0.456277792	34071.303
12.10915398	0.450142189	39823.378
11.68400959	0.423690812	36250.679
11.60765006	0.46588553	32591.64
13.48524638	0.405181948	59373.497
12.24083535	0.391016759	42862.99
11.63767331	0.462372778	32442.409
12.39593199	0.396920898	44009.388
11.91126148	0.454611899	39327.468
11.7552282	0.427153685	35766.558
12.69145776	0.434437421	50077.417
12.63963172	0.460154358	50011.909
12.19521792	0.447954951	41882.473
11.90449747	0.418253168	29972.596
12.35225485	0.463477837	43339.226
12.25679567	0.451169156	42371.482
13.45787093	0.42656625	61741.038
13.30529519	0.425494867	57251.712
12.83751962	0.437895448	48954.537
10.36367551	1.163222195	21060.058
11.92651458	0.433836315	35869.912
12.38931273	0.46564137	42233.51
11.99195272	0.497429541	36096.933
12.23725419	0.458732561	40067.76
12.41128599	0.429833847	45154.576
12.82851667	0.462565297	49725.981
12.44129013	0.436362692	44473.539
12.87233157	0.420066393	39717.82
12.24177316	0.454972437	40511.523
11.6873915	0.484361364	31637.24
12.39815349	0.416059644	40605.395
11.66001887	0.451728527	33403.249
12.20643601	0.434344961	39115.66
12.89211969	0.424619954	51862.267
12.07106913	0.475774588	36176.222
12.99087372	0.427859105	52173.781
12.22413473	0.455978294	41585.832
12.35963511	0.439324662	42209.213
11.80569651	0.452763759	35105.135
11.9273178	0.467406562	36209.388
12.30054796	0.464101606	43290.649
13.58516765	0.443110795	58051.846
12.62163104	0.467492439	44006.244
12.45082447	0.457064726	45754.048
12.08355742	0.463618687	39410.331
12.01657564	0.459091818	37724.629
12.46682839	0.442757624	45143.809
12.08779591	0.522595136	35720.942
12.04996971	0.473339096	40140.439
11.92253497	0.461173971	35728.903
12.12604016	0.472785311	40805.443
12.85297592	0.423576396	49877.353
11.6486085	0.513991695	34466.243
13.57215127	0.429792081	60369.682
12.56950516	0.444526201	46155.465
12.17440882	0.440846007	39961.138
12.73369742	0.418271223	48662.607
12.0237228	0.518948137	40216.964
12.05719785	0.485450187	41708.239
12.31832213	0.460489873	42674.497
12.13961408	0.437173596	41671.36
11.69280976	0.506529286	32245.987
12.01591528	0.484795517	38074.974
11.60041508	0.613612634	36380.777
12.60600056	0.450947975	49409.017
12.4608214	0.433178364	44692.173
13.69572744	0.43902025	62294.736
12.16150279	0.630545964	41435.529
11.81458125	0.453702008	36542.979
12.07767858	0.467340209	39160.015
11.39209375	0.521966435	32091.891
12.12873736	0.511112488	42677.715
12.54207319	0.42832594	45499.946
11.88599554	0.524223272	38261.356
11.75548978	0.554708787	37078.542
12.98639673	0.423628429	53896.835
12.616211	0.44469729	46932.779
12.04860946	0.532280753	37361.73
11.66372582	0.467268133	33910.199
13.05542339	0.427674577	57170.931
12.20742192	0.442139037	39060.015
12.38833887	0.465226551	44875.183
12.18911277	0.451975899	41129.707
12.41710796	0.435493901	42897.383
12.26510334	0.44606871	44674.425
11.89938822	0.497111631	34393.773
12.84580865	0.500806935	51070.123
12.14320715	0.639996264	40581.289
12.03913577	0.542898945	39102.274
11.93189423	0.487001382	35321.23
12.5911175	0.497595433	45917.739
12.14992881	0.485106151	35759.164
12.17597758	0.506909478	36733.658
12.67434614	0.492772773	47904.542
12.74640851	0.491532912	46817.522
13.90660383	0.439215636	65816.37
11.92917642	0.45671912	33524.209
12.23718268	0.499893472	40690.984
11.85262671	0.470113369	30259.84
12.41368559	0.521310344	41477.743
13.17398649	0.500560881	54183.076
12.98396935	0.44000356	52370.836
13.02176793	0.445568618	51658.885
12.53321707	0.499596242	44378.187
12.54312003	0.465866182	43105.724
14.3708768	0.460190636	74676.084
12.37278223	0.474353698	44076.21
12.3792423	0.592541432	42722.902
13.39355293	0.457943374	58840.576
11.98008305	0.522086503	35484.604
11.81608268	0.681216294	34372.692
13.20723665	0.45213467	54534.126
12.72631643	0.473792886	49679.368
12.10692281	0.483392644	35893.92
12.55675316	0.467395975	44107.394
12.53292504	0.508620316	43347.516
13.27106288	0.441309741	54188.464
12.00935177	0.713306119	34939.977
11.66126237	0.523994848	32224.123
12.27895761	0.470838166	40423.473
12.77560723	0.466450686	49118.716
12.57962122	0.547974381	48686.248
12.71810953	0.450301424	48441.363
12.22954742	0.615155482	40204.174
12.58136956	0.484258247	44545.403
12.74248916	0.465433615	46388.194
13.03431394	0.460618189	50323.262
12.55496754	0.478121478	47680.286
12.37542323	0.475549872	39376.499
12.43941759	0.487942973	44605.504
13.71286039	0.454537775	65380.511
12.58008426	0.486279112	45981.702
12.68890815	0.503090746	48608.935
12.47639331	0.556096781	45901.931
12.37122104	0.491705343	41869.386
12.41228504	0.48799025	42538.395
12.57266121	0.484100446	44989.687
11.89756866	0.612754894	37379.058
12.86755027	0.464366372	45171.871
11.89330106	0.499514476	35575.942
12.42954223	0.50105726	42118.716
12.36263241	0.48674269	40894.329
12.79089754	0.465474903	48479.272
12.60365503	0.582512982	45649.367
12.83590706	0.461267744	46556.52
12.65866146	0.48900379	45381.891
11.80633474	0.924581019	36191.09
13.23941577	0.485184365	53087.331
12.46956174	0.515123091	40704.015
13.21530628	0.53380284	52374.537
12.65876653	0.627513091	49308.732
12.59213842	0.487450941	38736.983
12.80614657	0.507250026	45918.618
13.47047475	0.51915532	60466.647
13.2679633	0.511495717	59406.157
13.22015393	0.492691308	50139.403
12.79059772	0.505125616	49666.35
12.35217673	0.500218628	38962.958
13.67790773	0.466485617	57842.534
12.43403635	0.561304817	44075.876
12.7179452	0.521056689	45369.743
12.43864301	0.546465987	39313.656
12.85752931	0.517089329	47259.687
12.60023571	0.548544015	45779.883
13.40256281	0.458248137	54675.902
12.35078702	0.91684696	38277.961
13.35068275	0.509104935	53987.893
12.75758755	0.515115301	44913.086
12.58087875	0.569942101	41369.864
12.46197697	0.563300248	42641.072
12.7036109	0.48844865	45024.972
12.40699238	0.606499727	42535.996
12.67786733	0.536969603	45397.035
12.69090147	0.49358339	47560.488
12.83738875	0.54477005	46632.099
12.32339888	0.61714416	42913.264
13.04048044	0.528700861	49974.726
13.09371872	0.503775052	50793.026
14.16820243	0.460531369	63511.365
14.30305352	0.483636783	79248.441
13.02217993	0.480346255	52063.215
12.88909384	0.533777086	50399.858
12.64983873	0.558439324	46435.08
12.40906685	0.682012584	38619.475
12.66441669	0.550499599	46976.253
13.22155097	0.493216971	52889.933
12.95930631	0.500729363	48457.059
12.65569832	0.498884579	44320.54
12.44687752	0.522629737	43229.863
12.46635592	0.532655777	43002.161
12.6449314	0.499492357	44115.221
13.12110018	0.508585228	53728.294
13.09382183	0.526113791	56429.428
13.19264151	0.523630764	54185.674
12.63849437	0.622277815	43602.876
13.35481861	0.506530426	52496.484
13.23927302	0.468625097	52331.963
13.38303702	0.52690061	56447.686
14.83347431	0.498201624	87739.253
15.02500416	0.499164611	81983.985
13.04185301	0.554401935	50652.561
13.20619892	0.645506651	55126.62
14.29609877	0.485497085	69779.822
13.62434953	0.493672759	64002.055
13.31525216	0.551791194	54498.34
14.12434034	0.516255364	68599.908
12.62936855	0.645442216	46222.397
13.31870977	0.537805927	55225.201
12.9156502	0.551018499	45494.132
12.9988488	0.588112005	46051.386
12.6091554	0.546292411	37691.259
13.58004529	0.536741502	60305.724
12.93272748	0.578618304	51401.419
12.82904907	0.54663019	47345.767
12.80232206	0.801784865	48693.313
13.42094632	0.577804851	56738.723
12.81335046	0.548984285	44091.934
12.86557344	0.612188881	49121.323
13.15307074	0.53616503	49971.056
12.87713866	0.531989354	42717.29
14.28300564	0.523739206	71854.848
13.40681207	0.584614472	57043.957
13.28425459	0.51277887	52419.053
13.17521537	0.532053871	52165.819
13.14486516	0.514139206	54223.669
12.66106947	0.598156416	46315.698
12.80983841	0.566674556	41711.218
12.63638121	0.542432198	42599.279
14.12474071	0.482974644	64374.902
12.99580048	0.515131464	45505.018
12.85924337	0.600952393	52738.193
13.45511576	0.529841524	58548.559
13.07349112	0.558023527	50650.699
12.78201862	0.65529963	49640.518
12.57175326	0.748967673	44710.997
13.0357098	0.546117662	48329.237
13.45117764	0.586263495	58497.63
12.33688453	0.511737289	33708.618
13.0281004	0.486496801	46756.94
12.59808239	0.642366373	46712.497
12.74863522	0.532296932	40196.367
12.87129325	0.887466435	48056.878
13.39842677	0.523756754	58320.475
13.32703193	0.553980821	58740.078
13.428208	0.571539652	56645.759
14.1692798	0.466075127	69446.283
13.11059152	0.547241695	54441.548
12.91135043	0.582204612	45588.49
13.05867451	0.600871155	51076.274
13.04201902	0.641225436	54207.393
12.94871847	0.536659026	48231.195
14.32732808	0.489750019	67295.357
13.25130107	0.575186616	53042.935
13.3126008	0.531590576	49538.415
13.48359225	0.607006783	56733.531
12.87808487	0.633205328	52445.68
13.30875727	0.49786839	53097.112
13.65203501	0.512804981	58906.997
12.97426491	0.570736608	49646.194
12.9559303	0.545009839	47104.396
14.30755255	0.48174902	68921.935
12.66089412	0.532833802	38107.886
13.54611273	0.575901836	58173.683
12.98998152	0.542384625	48482.759
12.93559933	0.551342694	46964.177
13.23859283	0.649115129	52195.02
13.23001965	0.575413651	51120.117
13.31745546	0.753725661	55561.279
13.93076703	0.585365832	68276.314
13.63809188	0.540441664	59188.284
13.63415784	0.543134369	56305.847
12.94990077	0.764918517	57879.597
12.97994414	0.562992946	48902.294
13.17207918	0.608527526	51528.096
13.16998481	0.579575379	52818.469
14.61073749	0.530915526	75853.695
13.27711979	0.59186101	54891.671
13.67261972	0.609646028	60958.712
13.14124766	0.628836115	51410.171
13.2419519	0.61595912	50187.054
13.17095175	0.571394978	49216.965
14.62251175	0.518561765	82625.149
13.49040585	0.594061709	57282.078
14.06410751	0.520596599	69816.006
13.36166793	0.671101809	55064.725
12.72209692	0.609347789	45257.82
13.82286403	0.615649974	59365.873
13.4031597	0.550158958	50947.117
14.2559826	0.499617625	69068.028
15.17564068	0.505836149	82744.345
14.40946841	0.517206692	76048.698
13.52863001	0.624315968	61887.72
13.08416486	0.711764083	53386.468
13.41676787	0.592595323	55634.364
14.63786187	0.508445138	78751.827
12.96290284	0.639164424	48199.041
14.24144515	0.53209939	70686.327
13.69088492	0.535829404	60664.085
13.26514794	0.562346451	54034.71
13.89210135	0.58573331	65136.526
13.90834749	0.611971965	65565.274
13.3020754	0.652967455	53675.078
13.43531875	0.610671246	56824.442
15.46679637	0.542660592	95130.929
13.12676921	0.69716117	46534.85
13.06195812	0.832203163	46854.031
13.58679506	0.577778356	60052.703
13.69488627	0.592735819	61672.968
14.14189414	0.544216247	65192.851
13.15032281	0.700872296	52159.777
13.08183626	0.688970959	48984.02
13.26674678	0.636267795	52622.085
13.98780826	0.579446364	69978.026
13.29355709	0.791801985	53895.481
13.30996243	0.673394756	52521.546
13.21190107	0.610421413	52001.614
13.21480571	0.577022068	51944.962
13.28239399	0.706238724	53427.738
13.32559642	0.553572743	50932.803
14.54490426	0.539980078	78351.893
14.35160723	0.516074805	73029.693
12.80821846	0.627036149	47886.382
13.59880767	0.588944436	61606.682
13.64244956	0.580603564	60689.54
13.8005576	0.590035876	62495.756
13.05792403	0.677751929	49106.646
13.31829006	0.590629908	56485.747
12.88531373	0.546229401	38419.608
13.81525751	0.573715016	64431.285
13.43712804	0.583096875	51784.881
13.52136532	0.627282739	58805.527
13.42443667	0.617923234	54241.177
13.80578755	0.685958484	56411.463
13.46504957	0.642338154	54931.649
12.6432832	1.036801164	45874.858
13.40377596	0.642955678	54894.912
13.09477224	0.570663162	47715.29
13.74492888	0.615824211	59692.669
13.80907854	0.575591135	58626.155
14.06954157	0.619547795	67934.865
13.49541441	0.694803622	57181.573
13.29945751	0.618238408	51880.62
13.70373562	0.660529398	59766.118
13.22666247	0.597451618	49405.001
14.33249769	0.615724011	64843.337
15.04040791	0.570787381	81771.517
13.97974749	0.715507256	66825.662
13.79376743	0.991385688	57991.86
14.51755833	0.55963396	74956.173
13.35671966	0.649899824	57241.869
13.5016673	0.656736096	55664.498
14.89604612	0.534400492	74373.315
13.50180321	0.56316022	51899.857
13.63324429	0.665712558	60168.634
13.63068964	0.610333278	56141.471
13.10694167	0.606251728	48793.659
13.62654322	0.652542516	55708.541
15.10561154	0.538365788	79462.311
13.56314307	0.621726856	53500.448
14.02380975	0.623701655	66638.75
13.53630821	0.617266639	54702.196
14.74396894	0.512398972	75422.511
15.72148371	0.537973865	102058.118
13.13414101	0.684519617	53027.518
13.80859479	0.661803074	63685.225
13.71553681	0.641442827	59100.121
13.28882877	0.584315893	47198.87
13.17170224	0.56448915	47215.624
14.86782768	0.555077912	82159.79
13.82673425	0.622225786	63116.205
13.94268912	0.582408748	62178.356
13.60200647	0.773904222	55879.569
13.49435438	0.57558877	50174.024
13.88922172	0.622141806	60504.041
14.3553436	0.549960298	73758.808
13.78767928	0.552492519	58749.919
14.7319252	0.546410307	77674.936
14.19085586	0.621773452	67837.043
14.75544239	0.594575185	83427.697
13.68858247	0.737940228	59808.712
14.35803503	0.652667224	68668.588
14.24163228	0.653906321	68312.131
13.99443747	0.623657282	65943.429
13.36893077	0.639758582	49975.54
13.53347073	0.670542861	53341.495
14.0065731	0.70087817	63639.958
13.71327824	0.664366768	57569.147
13.79314177	0.711097547	56539.877
14.15879797	0.817116086	71821.047
13.92442638	0.648817327	60833.766
14.22511547	0.664672019	65108.808
13.78666058	0.659037045	60756.136
13.25072262	0.680554996	50608.266
13.82632959	0.695307591	60920.259
14.28691044	0.72147553	72832.823
13.86647684	0.701709517	64732.221
14.54470935	0.71634486	75002.146
14.08613893	0.682749736	64612.581
14.74765575	0.614608002	78625.309
13.52117709	0.800795413	56507.096
14.70466797	0.639282703	83560.372
16.64007903	0.559640936	119918.492
13.31044177	0.824400082	52975.906
13.33228075	0.84319619	51322.965
13.39480198	0.677364245	54382.885
13.34206318	0.741889485	50791.809
19.26092781	0.741547151	195143.648
13.83266786	1.187877158	59130.916
14.12090578	0.647234858	67190.589
13.7809528	0.890756599	62237.677
13.69356126	0.626092678	55140.04
14.36879814	0.62235424	70481.542
14.3167629	0.656633283	72934.858
14.86565505	0.542388898	75606.377
15.70556398	0.574253784	89329.599
14.08765346	0.835933776	63953.876
13.80510485	0.652804696	60141.701
13.53015078	1.007005026	60135.558
13.64691723	0.947745674	57544.111
13.66144502	0.673222173	59117.328
14.84472836	0.627865586	81436.384
14.92193486	0.608445023	80176.29
14.28136898	0.701361509	68517.717
14.55414408	0.698867382	71041.264
14.38987943	0.708122507	67704.821
14.57779098	0.71952699	72199.198
13.90910925	0.718403811	62849.219
14.07612731	0.705161102	62557.537
14.58385957	0.954541033	79831.842
14.24742889	0.660567011	63408.507
13.94719649	0.756043833	58327.14
13.74690983	0.683929944	57579.309
13.99199485	0.829769083	63767.151
15.73238793	0.606268506	94419.062
14.40212693	0.729014081	65643.222
14.26066899	0.649506128	65358.421
14.66224676	0.639768431	76831.159
14.38239931	0.680243688	70238.471
14.84538076	0.649158337	83320.7
14.29865029	0.729127601	73155.85
14.96553039	0.688167208	81754.587
14.28763031	0.606715972	65059.659
14.82837314	0.616603739	75749.134
14.62585929	0.682421573	76057.611
14.74288099	0.618361542	74054.902
17.53335564	0.618520563	144703.483
13.88470705	0.706289553	58564.973
14.64351939	0.67800642	74028.717
14.61648692	0.752011819	73572.196
13.46318647	0.826970186	53526.749
13.66198521	0.808346088	53921.716
16.19002162	0.585770949	112318.099
14.40814388	0.750722886	65425.294
14.57780402	0.696851498	75076.082
15.11773859	0.63085139	75596.988
13.95896271	0.725914985	63576.168
15.20319111	0.568603968	85448.613
13.97407814	0.687203583	61786.943
13.58349697	0.911454974	52049.412
14.20940604	0.827901337	70769.184
19.82834184	0.778526827	214841.52
15.14340682	0.67423194	88223.18
15.31359527	0.67024779	86175.439
14.77524754	0.76091235	73468.902
14.39507103	0.867326347	64698.996
14.03985719	0.827417563	54954.729
14.71332084	0.706500157	76204.822
14.99877795	0.664300513	77652.175
14.49311699	0.774324093	71038.519
15.32033387	0.687451683	90241.637
16.00288693	0.607107171	104486.166
14.90186331	0.62104585	79644.5
14.67032685	0.67798283	69339.474
14.88227335	0.782604577	78631.487
14.75726973	0.66523916	69981.27
14.39386432	0.785399443	65121.331
15.0319982	0.854494899	78800.292
14.18528956	0.783759614	65600.218
14.11736696	0.666914797	52848.081
14.28028781	0.742333177	69484.727
13.17323119	1.825716733	40884.659
14.06031436	1.025621412	56187.292
14.41406223	0.691107909	65020.913
21.69709589	0.884414549	286450.304
14.649101	1.024684423	72329.123
16.04361244	0.604705514	96473.795
15.43950874	0.662883593	89211.933
15.53600592	0.593564209	95770.096
16.92743513	0.642314722	121747.878
14.68583535	0.76584236	75024.606
14.46882234	0.883973608	70888.049
14.73133769	0.735185752	79163.92
13.88551583	0.740585108	58734.318
15.06607547	0.720824367	84687.841
15.79025491	0.639329745	102979.198
17.10548976	0.685502108	134642.199
14.90623192	0.747775413	77223.018
14.21081454	0.759970952	62703.746
14.54252763	1.010141187	68027.951
12.47236345	2.651367064	30296.961
14.76666178	0.711345871	81979.854
14.25837859	0.815331977	66630.768
14.08884346	0.811868774	62946.47
15.85550062	0.600747494	99424.699
14.65580261	0.729936602	73947.84
16.38217629	0.608586351	114302.669
14.52808625	0.948670326	74562.4
14.78782946	0.686895583	73430.241
14.72196488	0.844128521	76031.794
16.21220836	0.597264623	107792.981
14.83918327	0.789478777	80586.423
14.00373343	0.661419789	59096.49
14.20253393	0.829096711	68187.282
14.49901273	0.851002073	73806.214
14.36858379	0.816277951	73100.637
15.45161869	0.690421524	93431.393
15.23036342	0.686842406	87311.934
16.94039344	0.622893585	121603.626
17.86543059	0.690448306	140533.729
15.313895	0.865605176	86979.374
15.32440113	0.611344009	84217.702
15.26180134	0.725062064	89446.641
22.32763019	0.960905609	309704.391
14.71447621	0.828468154	77120.116
14.23754052	0.860965507	61043.896
14.68501038	0.741582808	73705.392
17.26022103	0.630142058	132808.448
16.6483804	0.628780505	118175.91
15.00761607	0.842261312	79607.656
16.01686268	0.749047811	98706.77
15.06751008	0.678768139	73405.307
15.71360684	0.705544752	97323.409
14.59497653	0.812340741	74017.731
15.17820115	0.816800332	86543.151
15.55656935	0.663480037	91107.965
15.94931096	0.678368907	102072.035
14.28131962	0.862790824	63731.84
14.22442512	0.852475639	68951.393
14.97306014	0.871440477	75068.834
14.22391121	0.770664431	64373.771
14.58925803	0.852781932	76926.668
15.21222206	0.658242994	79056.118
15.30855349	0.800674706	90143.948
14.94521127	0.824457045	77999.601
14.69054458	0.728766756	69959.692
15.00517311	0.741134534	77172.168
15.08543437	0.81763374	82405.52
15.35732822	0.683535887	93523.684
15.22994058	0.73793513	87319.148
17.72535782	0.742655486	151566.645
14.48000794	1.044464434	67335.85
15.03389903	0.70299231	76046.145
15.2954418	0.70354908	81405.58
15.20483805	0.753205485	83842.296
15.18960763	0.712455463	83046.012
21.48637754	0.904592582	279226.459
15.00180089	0.93488265	82596.639
14.76108702	0.960119322	74244.285
16.30757493	0.629766582	111783.208
14.48080419	0.792100741	70473.365
14.47189932	0.866669175	63519.376
14.71438854	0.801433649	77549.557
15.61273583	0.787063425	98837.491
15.10941329	0.652722645	82606.587
16.35335623	0.639970681	103635.275
14.3300164	1.027856353	72446.749
15.0304624	0.793398241	83263.169
15.05159194	0.693874258	81249.975
15.48515741	0.866575716	94692.978
15.09146083	0.876594993	83161.992
15.30981972	0.806890475	91627.141
15.18903749	0.90932395	85589.58
15.48025581	0.736572107	89903.027
16.50884581	0.69049584	104589.434
19.45787398	0.76504265	202877.466
15.76754293	0.83137879	92839.102
14.45414923	0.841760337	69969.835
14.88020766	0.879758338	76456.304
14.54516552	0.746216894	62874.877
14.58998492	0.789469833	65354.691
14.69153021	0.802476549	71440.697
15.6048595	0.792850378	94504.81
15.80374259	0.887940467	90690.162
15.96855973	0.726014034	104656.132
18.40070651	0.713342151	171888.089
15.00209785	0.784673753	79137.836
15.67407637	0.812517677	102519.193
15.34825234	1.075545316	87706.387
15.37317534	0.782745721	86996.858
15.6229085	0.816541334	92946.495
16.1706818	0.706770176	104769.908
15.26979797	0.897406415	90705.594
16.49352267	0.636384813	106814.132
15.2158539	0.819246205	82113.854
14.7685375	0.82474178	74793.991
15.22144671	0.941914122	92244.661
16.01330416	0.644474851	93624.044
15.29377194	0.965556052	93955.042
15.51062217	0.812559309	86873.05
15.13166878	0.722124167	78285.837
14.9177991	0.872610196	75297.839
16.33832213	0.959232354	117027.181
17.84185136	0.683673554	147260.036
15.38309104	0.747829065	89501.514
15.41443447	0.703923964	81700.23
15.08953843	0.800225091	86863.417
15.63642254	0.713725042	93871.998
15.64834911	0.659130478	95776.747
14.92869418	0.883001972	74278.955
13.6104346	2.577845289	46161.353
15.72255704	0.730404459	97026.296
15.84447632	0.693033061	102010.057
14.75598557	0.842798163	72165.994
14.67852206	0.784591772	67809.8
15.03195862	0.980531884	77598.08
16.05917619	0.729758168	107272.413
15.88562935	0.816913947	87302.145
14.99777684	0.889874314	73163.91
15.78464412	0.80031194	93466.369
14.88544793	1.238233903	77303.909
15.47457366	0.936539956	91036.977
15.83915623	0.726479534	96794.111
15.59128218	0.79326586	94850.602
15.6589211	0.940955837	97176.468
15.68864016	0.875347858	93564.181
16.09739016	0.833009544	107084.242
16.0413818	0.798355922	107465.034
15.15846793	1.219953446	74562.397
15.13119196	1.056154445	82406.294
17.75318563	0.684050383	143356.731
14.77918198	0.855162	68629.235
15.43572318	0.805694654	83223.644
16.22409597	0.654176851	100164.785
16.12483829	0.815866648	102743.103
17.55044558	0.905750772	147233.39
14.90377704	1.819744668	71068.003
15.22982502	1.097423381	89280.066
15.8016439	0.763465504	94442.214
16.78447259	0.689608725	123986.639
15.89967358	0.869744902	110208.547
16.14880274	0.808636568	109473.612
15.67738148	0.977827204	85762.284
15.24048031	1.000744193	84311.198
16.76268385	0.749643969	114450.313
16.71045242	0.737424194	120597.315
15.47086326	0.906218322	91659.342
15.57102566	0.84378193	95104.613
16.89663576	0.669688557	116317.58
15.30126237	0.885071148	75751.082
13.46082873	2.531304872	44834.046
15.07703552	0.86930889	80302.86
15.28199365	1.079475862	82489.045
14.97594304	0.954838053	75408.549
16.99644522	0.711846133	130444.388
16.45731995	0.881800669	120125.226
15.3068795	0.867487431	87022.762
15.85734246	0.796784182	94486.647
15.40608224	0.901694473	83493.647
14.98736902	1.308948863	84055.225
15.5727618	0.804381322	93565.96
15.9766852	0.754722876	93280.625
15.08000199	1.765497389	81051.32
15.29381901	0.981161914	82875.264
17.20815562	0.677784799	133384.225
17.43401073	0.701428441	128193.607
15.70013057	0.812881606	93110.253
15.02433825	0.783522384	73088.162
15.56573898	1.323728555	92232.891
15.32804913	1.038749388	78623.293
15.89523042	0.821051639	94580.185
16.35421872	0.756266136	105539.459
15.85813451	0.860345114	93127.071
15.66749789	0.942275865	87723.808
20.94585687	0.857498872	262966.984
15.19202488	1.004640057	81871.91
14.90250717	2.388492192	69611.164
16.08035416	1.054274203	110962.702
15.14047886	0.900939522	76441.85
17.24312878	0.699213995	134285.885
16.4238543	0.815877713	111083.49
13.10502728	3.624483123	35741.338
15.26396541	0.870937068	81332.146
15.1844045	1.083350118	76554.12
15.65598512	1.068695921	93893.11
12.67144901	3.678060762	34112.299
15.57021259	0.957328198	89649.086
16.36661419	0.8328164	111419.328
15.83698393	1.009438663	96172.112
15.99075577	1.057663945	100350.54
15.78143498	1.047573444	102331.129
15.71101461	0.853674575	80502.394
18.23049149	0.713917567	157791.665
15.70814056	1.125487507	90517.691
15.92795687	0.842268808	100039.709
15.98274851	0.865442943	97220.344
17.27052431	0.73616566	130092.358
15.91186633	1.201542631	97817.593
16.9607149	0.865343248	121069.27
16.2241801	0.869622357	98341.848
16.67559624	1.276703955	117406.15
15.13794933	1.274354036	78596.235
15.35651328	1.047729634	78176.954
15.58654452	1.411805951	84654.615
16.38996126	0.953342468	107782.884
15.56221899	1.320417093	92568.521
15.52953863	1.248377517	97092.618
15.56097105	0.949893596	89045.184
15.83333067	1.053379037	98585.333
17.80356593	0.719095445	143892.164
15.49284383	1.104445444	85038.222
15.79471399	0.909429661	90348.396
15.65471431	0.968533498	98222.688
14.10042092	2.469336089	60686.095
17.85358171	0.694261957	138589.787
16.93179612	0.733365904	110949.943
15.46847116	1.133244933	87655.67
18.66988056	0.757879018	165735.258
16.15731506	0.93930771	104933.314
16.19404119	0.827405397	101129.272
15.69554937	0.805576317	84451.653
16.69864276	0.761824755	117415.972
18.82536905	0.79269142	166869.746
17.48659915	0.733641579	140757.866
15.52110724	1.385873465	91578.413
17.06744298	0.748122209	123382.761
15.58193281	1.678177346	95798.953
16.36215542	0.994846022	110004.863
18.23048573	0.708186632	144051.218
15.64217824	1.225190445	91014.924
16.32216683	0.80938595	112317.787
16.37660923	1.067724928	104461.514
15.68123847	1.056063907	95201.07
14.78300003	1.298929074	82747.803
15.70927911	1.032277815	98569.437
15.74006639	0.984639234	95176.613
16.09452422	0.956310035	100993.161
15.43200603	1.044967859	83664.26
14.74240923	1.4284364	71106.387
15.83404118	1.066595327	103807.017
16.01786596	0.96794504	105269.252
15.90740079	0.869743564	99359.09
17.10736274	0.837415094	137593.698
15.84439901	1.210096189	105109.66
17.40997932	0.799592618	135268.673
18.51745123	0.732700735	173828.54
15.95681547	1.226628328	99703.461
14.2125325	3.165982347	62013.795
15.68491313	0.942711183	89324.899
16.00550062	0.969935912	107577.749
16.03536966	1.031958786	104185.505
16.24104646	0.911816846	105122.687
15.65542462	1.106798541	87885.348
17.59262885	0.740118963	138105.642
16.44964954	0.884335695	115321.187
20.67870547	0.834490638	258577.268
16.13144538	1.284564012	97762.286
17.22691441	0.819778658	135182.302
16.35512886	0.890241954	101322.885
15.78884986	1.320152986	95625.009
18.54496212	0.72460403	184166.385
16.36967623	1.392741275	110600.396
15.80085662	0.92550853	90040.111
16.18568287	1.347686339	94446.654
16.23240216	1.059761383	105473.842
17.01072368	0.783553594	114339.106
17.99994944	0.719568781	161671.657
15.95307933	1.023200415	92603.922
16.17758727	0.917246319	104693.637
16.14551733	0.978161964	97516.266
15.81739264	1.163859738	104204.596
15.83596476	0.963324451	88307.011
18.47666122	0.751809044	177561.238
16.5897613	0.985052655	124719.295
16.8683704	0.975448317	125301.461
16.01362982	1.041887239	92916.699
16.09362203	1.256626414	99103.796
18.26966557	0.749208869	160715.332
17.80399618	0.895462525	154132.34
19.86932057	0.79910416	214472.449
16.38012485	1.210800677	95108.541
16.02393085	0.883379837	93379.587
17.4205264	1.388300698	139299.542
16.11413665	1.045522627	109268.385
16.14660491	1.144773594	106749
18.31106305	0.801505674	168386.452
16.12171858	1.432835654	108974.635
16.04302808	1.167565977	107550.979
17.93543337	0.830200281	158211.814
16.1671191	1.277505907	107145.655
17.16605313	1.30510766	110745.12
16.63002826	0.916089653	104193.978
16.82511278	1.129756195	128031.733
17.46436715	0.955756119	142704.917
15.67306192	1.11657691	90630.623
17.13469667	0.95185649	133255.48
15.85204656	1.05505897	93825.296
16.71664619	0.988440636	123402.091
16.55990036	1.04787199	118964.138
16.20365298	1.185261909	99539.297
19.08753153	0.77426142	163672.587
15.92516688	1.239337619	99310.516
16.03969451	1.377712232	97360.058
16.0833305	1.364790721	101766.648
16.08644896	1.12361476	95993.255
16.59131158	1.020994622	113647.894
17.34538901	1.152607183	124238.769
17.38213681	0.894176654	132370.563
17.15548076	0.881878618	125995.717
15.81906982	1.671886004	85312.42
16.34466335	1.008466782	102949.901
15.73970457	1.800828458	97579.712
15.94891093	1.62945002	98764.567
16.51907261	1.010160429	116883.4
16.33002511	0.949908985	101397.135
16.03911126	1.569473216	103554.373
16.98258137	0.914220817	122377.933
15.89276565	1.303410397	100050.058
16.62466421	1.86508341	105555.367
16.58847913	1.228230696	108674.443
16.54782765	1.097299746	116196.302
20.23764314	0.827734189	236449.169
19.22494733	0.798290853	212957.801
17.91476235	0.927494302	156759.353
20.89868632	0.856703828	231154.186
16.70168135	1.131361669	116528.223
16.45650024	1.131520294	109413.572
16.33722712	1.348448897	104515.059
19.74037183	0.854322941	201586.398
16.63686359	1.248371444	125019.075
16.34498853	1.427881055	104797.809
18.49260312	0.774231956	166236.288
16.37731602	1.068459889	99457.875
16.68910543	1.108334783	114600.554
16.58977516	4.881959786	103624.403
18.80819582	0.757361056	180199.297
18.69609665	0.984102736	165682.803
16.41228229	1.175995503	108134.993
17.10291233	1.136992537	143508.589
17.33116788	0.883925752	131073.47
17.57061496	0.97526277	151153.375
14.81196645	3.260414786	61942.869
17.61587523	1.054068617	135857.498
16.47040588	1.076150642	106654.697
16.36247903	1.42365753	108043.592
16.16537782	1.19181964	105297.488
17.22072647	0.952893266	130593.444
16.45966464	1.270788467	114174.999
17.80243158	0.992246551	150014.391
16.85196902	1.216459875	117631.006
17.4820548	1.04723915	138432.858
16.58670009	1.48898603	115202.186
17.17991123	1.073300502	127958.088
17.31853718	1.035078138	137739.508
16.50169264	1.759220301	113980.974
16.94829106	1.23692987	122434.855
17.90579208	1.054314515	160859.875
17.69080637	1.051246362	150279.011
17.85880427	0.878749128	144453.157
18.07971598	0.822238839	153714.029
16.58093212	1.467867191	111240.964
16.70692012	1.315024932	118596.739
17.44814145	0.880725245	129767.293
18.75855965	1.051778837	178538.575
17.86961331	0.95263776	159143.218
16.90071359	1.229309586	122440.204
15.95079058	1.787732101	102421.133
16.96110521	1.320264608	119713.74
16.63371516	2.059306073	103618.365
18.75332664	0.936055926	192595.27
16.12570743	3.348806366	100215.309
16.96778948	1.245471292	119004.391
16.62245168	1.271619789	109131.417
17.39442526	0.986374473	130266.508
16.68322361	1.36980503	115967.552
17.74145034	0.842074691	117899.729
19.50409265	0.900756553	210207.552
16.99165442	1.270548055	127803.56
17.25023043	1.056699556	126567.869
20.45545062	0.861247743	242765.24
17.56203946	1.729915523	142570.095
16.67472429	1.335902968	111195.268
17.94658129	1.149859758	152934.022
17.62827558	2.813185216	155220.957
20.03811094	0.842908138	215136.028
17.16827481	1.403152442	128305.998
17.34564527	1.378791669	140268.459
16.34613073	1.4870157	99256.766
16.70706826	1.244656153	116614.272
16.15767588	1.232026537	93577.611
17.33695533	1.294762138	129993.472
17.35204887	1.401615753	127880.683
17.18070051	1.147054382	120388.379
17.59822718	0.906558013	138064.599
18.28480298	0.913381428	143261.272
17.8272805	0.957313144	144764.795
18.70707246	0.88448842	173079.775
16.88707583	1.498815412	120216.244
17.05316305	1.477560775	124844.701
16.5874341	1.412412835	110321.051
17.05527426	1.153758767	120986.254
18.38273103	1.019504695	175842.795
17.13694343	1.295893964	114154.107
17.4472568	1.132259677	140313.039
18.41672881	0.888579202	167089.278
15.47294865	2.880457966	79774.006
19.44931207	0.851763951	188133.626
17.06220033	1.033685866	114735.782
16.75241684	1.095721528	110743.959
17.41630271	1.602518147	133833.937
17.03870652	2.157714645	110771.785
17.34586752	1.642745435	140664.771
17.36876852	1.458742318	132110.631
16.26709624	2.340009971	110378.919
18.09589954	1.012343948	155985.648
17.46680366	1.191082062	133752.067
17.9691967	1.309721779	143426.62
17.20970453	1.513484047	131042.718
17.19304103	1.574081748	126376.028
18.80012899	1.409278232	176898.73
17.77075322	1.506777789	146726.75
18.77608026	1.402757867	178393.46
17.68664016	0.982195417	134071.227
17.12068895	1.68929622	133272.935
18.11205041	1.309381192	146284.492
17.69192273	1.227920265	147422.957
17.93405922	1.140908664	150606.15
17.43077537	1.390173498	138939.307
18.64913188	1.026889025	174155.753
16.79763763	1.467740841	118865.434
21.03317261	0.865516567	244893.804
17.60141585	1.156495014	135775.099
17.54022406	1.201988742	132182.545
16.91829926	2.834633251	123922.573
17.67349909	1.056601529	133225.619
17.04134472	1.315544733	122853.302
19.55275479	0.819208278	200730.315
17.39035796	1.38865045	125920.704
18.72950293	0.975307283	186903.081
18.46911043	0.892276958	151669.442
17.07537642	1.410125997	131765.19
21.36663989	0.93033383	258437.822
20.70812522	1.11463972	243622.893
16.71144398	1.722844155	121552.645
16.79294792	1.653915382	121506.798
17.55976993	1.313958997	138486.936
16.83918228	1.828975621	121482.206
18.06167739	1.246371331	154964.874
18.0887852	1.370726117	162441.017
16.41015783	2.338711229	104095.338
17.23148862	1.420411231	122089.648
17.18803159	1.418082218	117205.568
17.94814447	1.447673223	145147.996
16.71665607	3.000776349	101297.287
17.22663403	1.253140737	111930.425
17.39450517	1.433909819	129232.425
17.03029477	1.468862357	123762.796
17.61171826	1.393308313	135298.163
17.28264361	1.266910892	123785.002
18.05234694	1.679390776	159534.536
17.44668507	1.909310853	138344.347
17.54062656	1.173171471	127972.192
16.98163272	1.307007937	111372.42
17.96225459	1.061783616	143338.597
17.31594468	1.474912287	133715.285
18.71141684	0.899486296	149804.684
17.28462554	1.190549709	112713.712
20.11696374	0.919764368	217232.525
18.83478564	1.081947329	176910.946
18.28671512	1.466275827	169935.307
16.55098517	4.20251017	91471.797
18.03444898	1.213385083	140546.846
17.71048842	1.47953823	136291.508
17.10775438	1.964552904	129018.999
17.91584048	1.573180178	154040.609
17.80550112	1.729181474	141403.775
19.2144849	1.127105969	188541.557
17.11444799	2.110709823	136258.347
17.36683851	1.972769872	128605.896
16.31011312	1.944152024	93845.675
18.73011532	1.239079295	188307.733
20.70622732	1.012301725	251819.668
20.0906426	0.961225859	218638.676
18.04319622	1.641439623	175161.359
17.62694869	1.790670498	128894.149
18.24553343	1.45171873	159192.366
17.61470039	1.234452016	136172.464
17.9024624	1.286119781	155803.806
17.60113888	1.678784989	137725.9
21.37666929	0.932133427	316575.94
18.6991441	1.63676529	172715.723
21.69011618	0.972912974	275443.56
18.8024299	1.379203084	177341.282
17.99897719	1.791597112	141509.878
17.80982117	1.938424671	136370.689
18.98925249	1.214101614	197041.377
17.9818528	1.530590592	152931.96
18.1523128	1.437461624	154120.718
18.9324626	1.322332451	178452.624
20.15352327	1.07211046	214372.556
16.66422936	3.1945355	114325.976
17.80716962	1.824093817	151622.751
18.95887734	1.439407653	181249.092
17.85258021	1.794627435	137588.158
17.94082356	1.626160001	141549.257
18.72128441	1.537929616	168904.165
18.35424011	1.506247093	168246.508
19.72864643	1.147979091	202644.317
18.50678119	1.971677499	161012.886
18.34728154	1.555278025	160702.036
18.67615619	1.791595961	176659.745
18.44562414	1.303265012	162220.531
17.3755305	1.65346257	122644.327
17.93954905	1.841877264	140197.222
18.61677228	1.357423022	163391.907
21.78289214	0.942282656	266613.789
16.74030944	3.16051775	116387.145
20.9780092	0.924841441	255915.328
19.18755743	1.244454427	198349.615
18.42708604	1.681070214	164498.946
19.38218667	1.27646303	211126.825
18.69722573	1.36807867	173638.753
18.60564404	1.354750985	169913.965
20.08894821	1.030645116	209247.239
18.56486143	1.485758802	161245.85
18.39455952	1.619993429	163532.717
17.9716869	1.864898172	142378.982
18.45615074	1.14736889	150233.883
18.33161231	2.058623814	166030.546
21.34852056	0.990716671	254370.321
18.454843	1.426567105	167821.398
19.65689192	1.144374006	198805.167
20.80059422	1.01372385	247161.563
18.99949315	1.352013461	181705.889
17.9404908	1.809866241	153100.656
19.47776142	1.248289894	185601.466
18.0084458	1.609879869	139529.882
20.43005335	1.05866838	243467.527
18.71980342	1.501141373	176287.509
17.30379351	2.072898842	124272.69
18.72730173	1.066082973	151539.622
18.67130044	1.271341088	169385.817
18.18397151	2.097452559	130619.899
20.11441622	0.987420865	220719.736
19.05022572	1.44979479	184128.644
20.10123081	1.263479116	223949.399
20.86725761	1.097056294	261520.548
19.11188949	2.194691668	168188.056
18.65560318	1.634775329	172826.254
18.45565035	2.033560415	157625.612
20.73725199	1.093678771	245402.019
19.48313322	1.459770922	218191.129
19.23115025	1.569089876	193416.616
19.1137257	1.736627646	183449.669
18.39844912	2.193213267	137856.657
26.85302962	1.282728038	552861.079
19.34291395	1.297369699	183126.884
21.05421763	1.109171338	261637.631
19.38279443	1.703969313	192794.836
19.65161546	1.450638978	226859.832
18.81889529	1.874231509	181525.795
18.385785	3.061861649	163499.532
19.03110086	1.479115845	185297.745
19.66740476	1.458686165	201165.919
18.48334277	3.115249517	144587.839
18.41220899	2.342238051	156563.403
18.14478437	2.226221998	139704.308
19.4993782	1.704156796	202360.849
20.28969615	1.158828312	217013.287
19.14062695	1.242464005	161667.317
19.2714535	1.830170238	188652.421
20.70983172	1.109391793	232903.222
19.4601277	1.459385589	194076.002
19.7641271	1.662070573	197172.755
18.82425111	1.87169726	179645.223
18.74214689	1.731164587	156043.757
18.81985919	1.523619726	172254.69
19.0238884	2.06263458	200885.259
19.05487812	2.412813907	178846.409
19.90441132	1.75148622	225678.795
21.01380356	1.220081576	244177.87
18.55921604	3.738470178	178843.028
22.5273729	1.209127909	339647.679
20.82059101	1.274799202	242022.625
19.27235248	2.281985986	174539.708
19.44621197	1.741079735	185362.608
19.54123768	1.744446719	209658.409
20.25881931	1.386271436	220445.612
19.69533117	1.732519237	216613.305
18.33371757	4.363038969	132622.183
20.09469084	1.873797604	220856.361
19.34301579	2.221629875	180909.482
20.23077705	1.374971066	221705.652
19.55439004	1.632322207	202565.361
19.66772076	1.58872613	182274.488
19.64566873	1.855501681	201995.012
19.8370401	1.317635042	186017.432
20.15177734	1.341108301	229025.523
20.09695474	1.334526375	194918.734
21.91975593	1.139381754	287807.913
18.53878232	3.239722857	175007.092
20.56829478	1.857706645	233200.605
19.62621308	1.715980896	209288.109
21.19875397	1.310678196	253169.142
18.77557216	2.150553955	170079.136
19.39541363	2.097564337	205716.278
19.69095198	1.685826905	193832.494
20.25119922	2.192122597	222427.137
19.60494529	1.63686208	194634.461
19.64443433	1.451700228	185767.259
18.88629212	2.843956362	169508.442
19.97041287	1.68454825	230873.529
21.30311738	1.14909624	276017.96
19.64294581	1.962749117	192647.57
18.56553527	3.062499218	174491.926
27.33477858	1.448735412	633291.902
20.01729252	2.30269663	220091.393
18.54986172	2.433676902	173851.284
18.87899203	1.740568073	171213.015
20.68649777	1.390602835	237820.173
18.81242701	1.775303055	183279.901
21.51683852	1.224149382	288244.618
20.34536901	1.230319984	215936.142
18.52217806	2.986212857	179216.594
18.26423746	4.721809869	153325.148
19.22425343	2.763148533	184728.556
27.23110997	1.364807448	627732.74
18.09542042	3.732301163	169185.891
18.88984701	1.930532505	163050.917
20.28727261	1.469428155	213324.571
20.08444448	1.840610513	227071.788
19.41469675	1.981328048	196171.155
19.4928728	1.672880946	214967.606
19.22535175	2.125745398	184716.277
20.41577233	1.924223385	245398.266
20.02339956	1.792098097	210963.125
19.31434389	2.166971687	193682.052
18.78049121	1.747205653	155268.045
21.07626058	1.519296879	271657.783
22.1328272	1.738710602	292288.392
20.36938438	1.339562219	204877.518
21.18051298	1.441464755	269364.22
22.18966742	1.239215279	324948.675
19.7899333	2.405113484	225154.767
19.46504405	2.059726567	192117.33
19.93477138	1.998254855	217686.824
19.41630912	1.943796606	176019.394
22.81556355	1.113128451	310532.983
19.64534729	2.272953641	199514.041
20.92513321	1.461816163	226421.707
21.42403137	1.673966972	272121.906
21.04195595	1.271087124	224544.341
19.94351925	2.621059238	234062.847
19.41546317	1.959262236	195089.713
18.65125304	3.150549362	172737.566
19.83268313	3.066490941	233470.646
20.42027399	1.778793867	225781.978
20.33150609	1.960017431	240189.104
20.5021933	1.885009758	258701.611
19.44526858	2.459513748	200055.946
25.31703162	1.21464966	534246.153
22.90868591	1.094375347	351727.148
26.55830755	1.379664942	598343.917
18.76150687	2.890020649	169441.096
20.1414282	2.357978167	241195.15
19.76130132	3.183960007	219293.667
22.08360455	1.506978551	294744.785
20.36769108	1.51792725	219557.982
20.08233129	2.39814453	215785.064
25.6525028	1.458912738	480187.883
24.83629743	1.427473275	479792.447
18.5241796	5.097902058	127021.114
21.85280623	2.350952444	300259.312
19.52098333	2.990041301	194301.067
23.85317631	1.872313023	403403.966
20.82277527	1.904883822	255486.7
21.24999741	1.68626778	276427.377
21.31143637	1.513710287	246967.618
19.27806811	2.579887805	188947.17
19.49246034	2.47569097	188416.455
20.5679294	1.866786484	232730.827
23.43696461	1.329525195	395669.965
20.87987069	3.637632858	222822.347
21.02084751	1.745779186	239245.422
21.07237101	1.849120285	251713.045
21.73817955	1.830394168	292609.649
19.56885638	2.882744923	192411.11
21.43960774	1.806333112	255526.746
20.74898046	2.264337106	238620.116
21.4324084	1.836404944	259553.567
20.7168598	2.374521103	243973.942
19.33808729	4.210436993	193852.28
19.84237007	4.287878041	224650.597
19.51612718	3.21795437	179210.284
20.54380783	1.97954801	217884.1
23.55027834	1.200428991	365012.467
20.25887608	2.417398141	237282.947
22.99378677	1.28219014	371882.506
20.92386843	2.35023632	272129.937
19.99636342	3.118750863	202646.237
22.41049977	1.771019904	348349.87
23.02703889	1.295436849	340596.872
20.33543779	2.679026307	242521.32
23.4479159	1.693660883	402131.03
21.62160748	2.043206979	297001.612
20.82100214	2.439825976	225393.292
20.16915665	3.113732908	230632.467
20.44175286	2.138217467	217034.323
20.21436148	2.521233467	222187.41
19.52157806	3.455150851	201767.472
20.46919148	2.002312004	231099.237
21.22473486	1.940778772	251014.775
21.55838004	2.449976717	285934.34
27.19196536	1.5889046	562662.783
20.76601984	2.287652871	250116.454
20.82711886	2.934276623	226911.492
20.10309976	3.007307312	220169.92
22.17643637	1.885614827	333822.056
21.28233728	2.063738238	268697.261
22.53531562	1.805336076	349519.662
22.26401064	2.112050691	325509.716
19.75190877	3.362276837	198677.388
20.70138981	2.75726041	256308.006
19.99311506	3.380484649	232199.266
19.31833688	4.102484252	187012.367
20.89081473	2.268482375	256284.186
20.27985108	2.901433508	239383.275
21.13236333	2.317864006	276299.681
21.97866079	1.860882774	279224.769
20.91717118	1.860446044	219104.921
20.85803107	2.588735217	254931.557
24.45684955	1.538998512	412595.116
20.70401265	2.739013684	241084.86
21.01756432	3.205293643	235525.738
21.68335975	2.065927252	278858.381
20.23306971	6.374179783	191948.229
25.05672405	1.287929501	479955.975
27.72750836	1.638555977	616975.119
21.55587414	2.440069699	267982.651
24.00811134	1.348085604	435530.657
21.94123834	2.54035568	291310.56
21.63460446	2.507595122	306123.451
27.32723495	1.402398666	627581.788
25.90179878	1.297642551	459708.136
22.1462717	2.347924248	322568.045
20.72905328	2.597470475	259676.073
27.60813413	1.386756319	665206.557
21.29475874	2.765155325	268680.478
20.00906595	2.760510677	214090.728
19.57753687	4.838672497	215218.513
21.08430127	2.402403004	260855.128
20.85858217	2.328338414	216988.861
23.55708577	2.129385019	425315.624
21.60349995	2.557022898	280654.606
21.97952661	2.589653206	313815.767
19.89141197	4.773338967	235458.262
21.87458548	2.463099879	298308.11
21.63908986	3.275995492	298888.229
20.95166437	2.681598792	267090.264
20.57206042	2.934266332	219819.771
22.46398429	2.405902547	320380.968
22.54479386	2.346601801	335892.52
22.73772878	2.4664354	302891.161
21.42513384	2.537825816	280403.136
20.35138374	3.843842571	255628.952
26.78478729	1.364611354	622354.532
20.07558941	4.056255059	233466.397
22.36036561	1.93997589	314158.956
23.17025874	2.207339997	386715.792
20.57681316	2.240006057	215057.29
20.51478028	4.97178032	239323.568
21.75813687	3.400648397	297235.29
24.96740836	1.555232318	494806.582
24.3445308	1.979289645	420258.509
21.62924016	2.277261137	277032.612
21.6104595	3.757947687	335109.766
21.68500519	2.308327217	263752.275
19.67174369	10.23102097	140708.657
21.87876916	2.782523138	303498.526
22.38833156	3.674576225	347993.39
22.1785518	2.133163169	316350.912
20.18732573	6.353600325	208722.966
22.02926917	5.156078019	304522.803
22.53558053	2.018753438	330671.246
21.66000069	2.933880829	254435.001
22.46337708	2.920665843	308260.449
33.43307479	2.097367527	1285591.225
22.33583242	1.961032196	295883.025
21.2685693	2.963064567	284399.897
21.7566291	2.424906083	267001.82
20.29491118	5.569426543	266969.247
22.82419221	4.709686766	356979.2
21.15326429	3.780656581	241929.03
20.89056103	3.370759882	252827.529
22.37031918	2.307768523	339049.141
22.10189698	2.3236202	300785.733
21.14262259	2.365315201	237130.665
22.0660223	2.58600063	318108.07
23.00032348	2.109701742	344478.7
22.80197535	2.224900558	338335.253
26.21929538	1.374355054	539981.347
22.12796715	2.678687772	311589.386
21.40492724	3.190312507	272868.248
22.45637304	2.320385199	341414.728
21.45184351	3.701557179	271458.783
21.92355651	3.328431268	300760.808
21.22888834	3.851094289	280075.259
21.49947883	2.637249586	258606.52
21.59302549	4.250557377	264508.526
25.34012845	1.814657243	542521.546
21.69826698	2.282833995	265381.54
21.30259397	5.840639832	270574.4
21.50875752	2.324486218	262381.241
22.45057037	2.257625112	320866.765
25.66143215	1.526569815	538721.779
22.05154099	2.879968048	294658.969
21.81111918	3.927601004	251821.087
24.00278338	2.35715126	407388.234
22.39747731	2.460749486	309352.079
21.96059016	4.057051537	272435.33
21.27467861	4.718229671	283264.547
23.12692738	2.605955985	385079.481
22.92888353	2.697057994	327144.053
22.31066942	2.630532706	289566.521
22.70119534	2.817916867	308858.217
21.14873495	2.907738237	249174.276
23.9382349	1.921593219	400210.006
22.00558838	3.469769087	320164.449
23.23938059	1.942562609	366116.203
22.46069077	3.290853717	334680.079
24.81446755	1.660699941	411823.797
26.15028738	2.683445903	588101.179
23.15754499	2.248649048	369301.209
22.8424285	2.401157345	356744.394
33.91334	2.138544187	1115157.853
24.06242174	1.849904923	387717.834
21.46507046	2.681353031	282452.731
22.29306619	3.251623697	318101.133
22.98514194	3.13417945	391675.597
22.04747038	2.70595587	296157.216
24.64630865	1.966645991	492632.727
21.5091548	4.165668939	273429.74
22.78107065	2.395237267	336182.814
23.38202322	2.459334746	411336.119
22.69348541	2.422932552	325014.128
18.9237092	11.89191387	98859.38
21.37660474	3.073140449	245549.64
22.92933994	3.123834745	375096.967
22.97058663	3.506175974	312114.361
24.89318622	1.881648957	465439.348
24.60283276	1.715389409	426182.339
23.26744743	2.326604564	362762.674
22.00164471	4.871102707	275916.107
22.64335443	3.287312753	330611.483
22.51389082	3.478152814	320957.438
21.94326936	4.305582948	327972.072
23.02826568	2.777527516	347530.287
22.88894602	3.049965385	350407.925
22.62433005	3.547267863	330315.179
22.58835563	3.4091369	342315.381
22.76810598	2.604730388	317806.267
22.76527597	3.258431162	341961.344
24.57484425	1.899599642	397760.266
23.930762	2.692669846	400422.43
22.64569297	3.298650326	295011.813
21.9166033	5.346436358	259533.227
21.87805042	5.373900179	300512.419
22.33996531	4.118320691	360157.323
24.65965551	2.722854828	447492.537
24.16229832	2.591317638	447070.155
23.05696598	3.227425219	304668.525
24.30306956	3.739795	429917.295
23.44116401	3.692817207	429322.401
23.11782927	3.566474146	347584.799
25.09042267	2.205581908	491080.688
23.7808713	2.629216328	380874.799
21.81751636	7.977569864	295647.184
22.74217228	2.599327619	373741.865
24.34473639	2.810716515	439001.611
26.34776082	1.860335041	536679.463
22.72260923	4.601714589	287190.458
22.90952815	3.339530532	371877.838
22.84779486	3.827941861	335814.241
24.83828839	2.328394693	497806.83
23.15894579	3.547950875	380946.471
22.67172953	3.774091921	331147.743
23.43969752	3.913139069	352665.914
22.88433656	4.53336021	295467.582
24.63420082	2.394022064	483208.45
21.81678391	2.875410199	291906.944
24.31173256	3.174359607	429099.377
23.06448005	2.692741522	347213.352
23.70948797	3.038573377	365361.107
23.55063354	3.567400035	354730.471
23.79194486	3.310069646	454623.094
23.36292554	2.966826955	328168.434
24.33986257	2.979849677	493754.91
24.19732134	3.000795882	423105.261
22.38663865	5.143041117	314336.719
23.06715002	3.845403705	331573.917
25.34657472	1.973504585	522377.531
23.71418247	3.012119264	390446.368
22.55531556	3.953620226	294127.917
24.09074075	2.388854247	436037.737
24.16916527	3.16382821	432218.774
25.5424527	5.203138953	471904.353
22.6471007	4.473989129	367485.896
25.48975696	1.703306018	451659.874
25.81744643	1.803869149	514766.345
22.30250121	6.968012626	361835.581
23.23735463	4.267451606	377892.959
22.96942555	2.137192187	302643.105
24.94773477	2.065403942	440424.069
23.09950844	4.192804125	374892.284
22.47508799	4.039488196	331212.673
21.51023291	7.604001215	322261.544
23.81797598	3.468189049	424262.636
27.19534648	1.856868876	781138.515
23.1637171	3.6380504	366858.571
25.20543275	2.332263472	503198.058
33.88824236	2.239875322	1287094.923
24.14009403	3.715996242	494483.484
23.64035385	3.815512791	418708.232
24.68249846	4.526810988	486370.198
23.74233813	3.842747612	441043.796
26.26318431	2.032558601	519823.483
23.6437497	4.898391738	404593.64
23.21050646	4.538028358	392045.627
24.79797472	2.681192083	536614.47
22.64822708	5.425671679	348777.665
22.26465877	5.610690846	318669.138
22.18133157	9.650180941	256328.205
26.82605357	1.970844374	633358.662
26.10114902	2.555268414	577862.798
24.08345885	3.525860563	415006.123
23.72143904	3.259012676	392042.201
25.29004824	2.849637377	503643.09
25.12652602	3.547174042	408862.04
23.06425655	3.946542383	370497.295
23.87863522	5.869675837	462736.85
27.59122197	1.610053576	668085.972
21.10239655	11.02872018	261892.576
23.66637235	7.006596683	391885.36
22.39271578	6.433868794	338109.484
21.80705413	8.942207178	265641.878
23.72290223	3.64427111	410288.604
24.04279455	3.370000708	399810.875
24.24402194	4.530829451	416379.32
24.24467942	3.538669402	440229.336
23.01487671	4.54243883	387619.8
22.20272168	10.2892749	282000.648
22.05072584	9.052201129	345156.874
21.63430124	9.171172923	313928.739
24.61377358	3.737622411	497514.718
23.61954868	3.164547733	374862.245
23.0680502	4.345223893	379417.474
25.45956618	4.169192804	558059.458
23.36864801	4.077991875	375513.607
23.34720433	4.203645418	377713.727
24.08158986	3.749500604	448058.137
22.23499224	8.685600451	264963.506
23.13143143	5.418411691	383810.329
26.01003806	2.472266342	479766.591
22.83414264	5.874646764	318814.947
23.87802798	4.231771117	395899.884
23.07137165	5.510606674	384300.179
24.80806744	3.244757884	431636.112
23.41155292	5.935328497	392074.627
24.34998686	4.621568399	464132.746
23.63750791	3.434359929	322226.311
23.94999687	4.57243381	415058.663
27.90547222	2.076030262	662527.933
25.06079987	3.312392178	457442.587
27.08376063	1.968950651	613382.602
23.1650286	4.724839343	376197.092
26.78319212	2.017803134	582880.408
27.21330373	2.750444618	563720.729
25.64673975	4.492465849	537046.162
23.97940908	3.561581882	399774.015
25.11009697	3.147207585	432681.735
26.16124959	2.241676441	508766.945
23.96186491	4.74351388	410461.667
24.09545268	5.166378952	422356.231
24.10798975	4.177236776	422381.518
24.16549813	4.394235994	404494.69
24.04088829	3.375526552	365154.755
25.44064818	3.449120791	491724.161
24.80493257	4.037783425	495561.912
25.80700196	3.001173249	562583.96
26.15209533	3.281925298	531617.195
25.95667313	3.489806509	538814.233
25.95157972	2.765322595	538125.993
30.63746742	1.718931877	1003884.696
27.39336763	2.0905021	675575.537
27.47606431	2.251143495	629179.774
26.78097814	2.435311054	576913.529
26.53385027	3.010428945	581702.323
24.70135037	4.637278815	488994.459
25.16898866	3.871312584	521229.343
23.15873852	4.306545222	340908.082
25.08634868	5.638980678	403641.616
25.14325675	4.951552228	566926.178
25.12678571	4.505348058	541844.867
22.87485366	8.975001352	392783.042
24.18983588	3.816734211	422406.558
24.80066834	5.297156029	426566.648
24.527782	4.22695212	451579.393
24.24737718	3.52558159	383143.826
27.23132149	2.72791389	674546.134
24.54024979	4.764662653	483051.752
25.73139153	3.284338405	585631.772
23.94580882	2.902755899	347327.979
25.47677099	4.136476112	520710.476
24.03876474	5.330705007	482621.937
24.44554888	3.350448838	448558.918
24.48968477	3.953639402	429340.853
26.8032679	2.510823502	548117.435
29.42996364	1.751644412	778868.372
22.88788522	9.512842378	337768.494
22.51871022	9.560138702	318566.789
24.65860276	3.348445144	456799.843
30.65909376	1.824863457	1012878.601
24.18375343	4.46978631	410622.883
25.29027876	4.634535132	506643.557
26.51912536	2.770163163	539411.489
22.51984791	8.285006524	348365.699
24.21114082	6.046001442	508025.743
25.63551579	3.703908519	541037.793
24.30181269	4.498085336	385578.412
29.75551209	1.690160329	1059082.11
25.13748615	3.661989026	488030.232
25.48439758	4.611206311	541887.957
23.96590662	6.6787694	476107.297
24.0142389	7.934452576	360059.984
18.18476863	7.370188033	100546.455
27.6809662	2.531321325	691156.281
26.37652706	3.371967678	602033.412
26.05604114	4.038748754	602539.208
25.34983037	3.971350732	475571.549
24.73108995	4.492481776	449837.688
22.85038665	5.16783778	330846.836
25.27102293	4.494076022	526135.908
26.33534982	3.831486445	605004.648
27.78315569	2.250594079	690116.358
26.72807139	2.43339552	544608.392
25.96261062	4.083452717	557585.056
26.6536793	2.976916016	569871.264
24.98104521	4.703956035	490609.846
25.54891191	2.908653222	523368.72
24.21676465	5.600006805	434670.34
20.93757985	12.15137845	182952.846
29.77186726	2.106227772	882044.626
33.49799666	2.216052791	1237035.196
21.73883967	8.625390216	355340.184
25.26224871	4.80862053	592924.227
28.98153705	2.226256635	834755.911
26.07302744	3.885263422	518416.031
23.29892573	9.800772548	367402.569
24.52840394	5.962767276	450554.983
24.1108038	7.039598512	416383.223
22.60576718	10.9494017	291641.236
25.59790382	4.795293318	581703.391
24.02113236	3.515362978	388820.085
25.26570561	7.896570751	438651.447
24.18041935	6.747547576	462104.238
23.13684464	6.494548255	349855.77
25.37626233	4.763428551	544042.573
25.25210625	5.37444094	471899.721
27.56424133	2.629026173	573723.294
25.47232557	5.334718603	523369.658
26.39378203	4.180086694	594349.486
23.51817893	9.471512117	417528.119
25.59386743	3.776463653	548860.707
24.74714165	5.486641252	445410.911
28.44587914	2.771230032	681999.011
25.69026469	4.407016321	544662.002
25.56871937	4.795442628	524283.405
24.15582124	6.198645778	398202
25.50674813	3.734658934	483044.374
24.80571547	7.548704418	388705.868
25.8527865	6.597599198	522339.51
22.62724663	9.377457909	357754.058
25.53232344	3.525259986	486240.183
26.40634829	5.190351124	509018.833
23.74249924	9.090435254	378403.851
24.73066376	8.257422989	519330.316
28.06521334	2.717694364	679747.051
25.70567175	4.156953791	502020.519
25.50248635	4.848069956	593611.918
27.54455209	4.165780599	698303.861
26.51970286	5.610138939	528959.093
25.09561814	8.132253585	545291.507
25.30527218	7.433775471	535417.675
24.95158332	5.347266227	427531.736
25.97859388	4.505595176	545780.426
29.304148	2.886686001	808757.716
26.54274948	8.318883878	577000.977
28.53166574	4.272418612	811635.893
24.66113988	7.788290571	537645.612
25.23333173	5.393009344	549745.369
25.91450791	6.680698742	604426.483
26.20869913	3.694051229	507062.668
26.18949484	4.490283284	600676.665
27.70661437	4.264473289	625226.489
21.45453588	14.72797201	218247.92
27.40858588	2.816695987	538885.782
25.58666684	6.342311829	573061.457
26.12183416	5.258593418	568244.325
23.68213039	9.878444211	351905.88
27.41128654	3.673470084	717642.831
26.37836538	4.975088836	588991.611
34.83506237	2.159890113	1404609.832
27.48804286	4.369936237	608177.275
25.02845121	4.854874988	466605.721
24.44886112	7.486881524	464994.228
26.97422029	3.648932723	563629.276
25.70149762	8.679892032	553577.948
27.59288731	3.815666919	751857.842
25.3419354	6.605113574	503079.931
26.52869861	3.945474478	548728.379
26.53335976	4.914151774	621025.423
29.24474089	4.767255683	851845.876
27.01215245	4.645000487	615285.077
26.3837033	5.783118721	654174.57
28.91527918	2.529400848	865012.482
25.6196128	8.633900376	500027.16
27.9851139	4.194059968	775857.727
26.38948768	4.688579482	617505.068
25.45742937	4.161870628	481937.084
25.47980122	7.082466007	587956.642
28.25631098	5.214597458	781427.555
27.00340071	3.634829759	646159.921
26.52237734	4.522012754	594840.401
26.17139507	4.336261188	546901.226
26.99810067	4.622532337	648245.976
27.76941879	3.782943712	663033.889
29.48119842	3.423443418	766770.002
25.62604749	6.015911279	555608.426
26.53829045	4.911124626	546462.82
25.72728027	4.252350864	529206.452
27.55912789	5.869485716	736108.005
27.32482827	4.044296977	729528.838
25.9622083	5.016452786	513166.796
26.39230589	6.024635386	564959.143
28.10190972	3.371471247	736545.471
39.56078791	2.65914662	2177238.243
27.69721448	3.769360211	730932.035
26.63412905	6.53613044	633462.829
30.00648547	3.045885028	903913.832
29.97858402	3.928607126	830294.545
25.42225816	8.576421079	480819.869
25.97418738	7.748480582	602049.215
25.90528402	10.19847947	474128.344
28.16155358	4.851731758	895651.641
27.26458417	6.445022468	658837.035
26.8619089	5.225672719	668297.389
25.32100353	10.21298849	414265.166
28.12857675	3.752193386	765924.107
26.97350904	6.618558901	567431.511
26.82386232	6.131557433	604421.136
28.01732161	6.002176918	708200.266
29.75728264	3.680527563	901170.507
26.19359807	10.86866003	456723.315
27.0263773	6.273686302	570855.944
27.36754739	3.829348557	590703.879
28.285468	4.479355616	831382.457
24.9384378	7.536155022	481990.513
25.96393518	7.790360909	648121.339
26.60051954	6.836562695	538446.686
26.42133418	7.396847449	597640.492
25.55557121	9.152148914	575717.516
31.99829089	2.551035809	1243874.4
27.37556776	6.910189494	641005.942
23.97395024	11.77338286	459556.708
27.78981522	4.762204055	703966.576
21.68074722	11.05313276	282521.691
28.25903395	5.426426391	820098.639
27.8065014	5.989105913	812208.683
27.60256582	4.019621543	605498.574
26.29138072	7.591508685	658014.679
36.76587847	2.377678063	1543363.334
26.36164259	7.869523759	530793.209
26.38137544	7.125293764	601729.094
29.19846195	3.670757271	910735.455
26.45849391	7.799735542	640052.555
26.95947162	5.568722547	554492.633
27.04515964	5.857716886	704047.185
26.11136783	9.125670788	605300.79
28.8449311	3.802143569	774792.459
26.41110391	6.779300912	701266.926
29.83967677	3.552305683	788458.616
26.54737765	7.51810801	663893.64
28.59268455	4.728333732	821226.734
27.17593881	6.365686416	649007.72
26.13126576	9.776590181	679470.251
28.26918534	5.670529887	773102.186
23.97974499	16.73132239	378450.437
25.43914778	9.464122692	498051.085
30.21785118	3.295078036	884008.265
26.77371397	7.617448007	620664.53
27.29410944	7.975519419	635481.31
28.82673932	6.210903037	752153.276
26.43207464	9.597762472	472278.488
40.96523636	2.837357756	2793389.528
40.12001595	2.740438294	2284175.076
31.78439916	3.163119643	1052980.265
27.89641375	4.524427587	696217.889
27.39818187	5.339626047	583705.772
29.83795452	4.454594694	927847.848
30.13158708	3.943817285	1089930.965
27.41105981	7.682796765	733087.739
22.16482393	14.82964351	204674.14
28.17729831	4.732630873	683666.922
27.37721315	5.107186227	599280
29.93625194	3.986990583	943205.856
29.91912465	4.369770933	1020731.976
29.57479146	4.102540408	888315.479
23.7085261	17.49451971	392294.53
26.34485434	8.58829387	620249.38
22.66030163	12.77698692	340881.018
36.65441665	2.834768704	1891682.717
26.44105331	8.186801268	584618.874
28.67162099	6.020423568	775155.753
29.06886737	5.450853813	852903.33
33.62648391	2.858329612	1512718.577
27.63491704	6.20114523	729300.681
27.94561862	4.40003559	613807.42
27.98520681	4.809786631	716146.14
28.96840296	5.177310582	863161.667
22.37915928	9.106231259	362000.595
27.99506403	7.420935264	744336.797
35.51082567	2.325175164	1623937.49
29.05476174	4.705544749	745059.619
27.59239877	7.068797666	642919.523
29.11350529	5.337421654	797738.768
31.93607568	2.92527226	931246.981
28.16656955	7.263681063	823574.898
26.47546959	12.11456487	794334.482
27.65824994	6.225392653	732205.348
30.18005219	5.705329203	969742.788
26.7008262	8.993202051	600793.344
41.93731811	2.966076443	2575508.625
31.22087395	3.839033965	911690.16
26.31367781	12.55962313	579551.923
27.01120194	12.59604148	621229.181
28.64537031	6.07353221	888093.142
27.87703517	10.86688526	631402.025
29.75207186	4.368195237	897795.615
30.06484891	3.797486841	832137.965
28.47952071	6.775185684	759131.546
28.31504088	4.586957282	815502.767
31.27561526	4.114192277	1100275.162
27.79848611	7.208294552	613371.195
28.27697738	6.720463364	843426.469
29.30887033	5.390913432	840233.229
30.0592959	7.614345098	789095.454
29.03618329	8.112266371	731867.438
30.19396082	3.76496607	851961.895
25.85014236	10.77196442	652526.117
29.85575087	5.346250669	905178.3
31.11991179	4.035794208	1043012.35
28.31937376	6.166848209	710234.261
26.5323527	12.07679709	582769.961
28.71730262	5.873054239	790681.128
26.79438896	8.04374842	625419.252
29.78335945	5.710572168	1025391.349
27.96595287	7.163801426	731967.46
32.93577766	2.973499602	1232172.052
32.58993909	3.46733165	1563009.956
27.12611565	10.91498256	703511.531
29.11083286	7.032237864	800018.413
28.70874449	7.566342559	869401.148
28.57652358	6.030927038	818663.239
27.74888106	8.129956835	757496.145
31.50124029	5.409793648	1225911.107
30.3616602	4.367508446	1051989.811
32.83067879	6.647635891	1217782.48
28.07373969	8.835644933	682727.417
27.38310848	11.73014051	788739.947
27.2762085	8.479588095	708897.499
42.79874683	3.195806582	2785971.517
32.76509423	3.694820637	1105690.754
29.34088462	8.237245212	946094.924
28.50896263	9.92092222	758749.243
29.05939022	8.704461149	930515.768
28.23904867	8.357788397	738632.783
28.5609086	8.284770837	771888.779
31.28713154	5.102410634	1163706.093
29.24379986	8.25268294	1030329.288
31.35569565	5.775964169	983194.401
29.35408796	6.338107934	829813.98
28.87977406	6.47398074	740768.886
27.6505877	9.709942194	755766.046
28.78543243	8.502333468	786114.949
29.08411542	7.422041471	889346.013
29.92474344	5.403275381	961811.105
26.72351979	14.54173121	578208.459
30.53802138	6.90985507	917720.529
27.77975414	12.10978248	858716.418
25.62113522	15.52780117	538800.9
31.50773556	4.586457904	1158783.22
27.77890333	13.51834257	828945.78
31.00068257	4.349295782	977302.139
28.91485016	7.806802693	851469.954
27.44882639	9.825108718	626870.949
28.01794175	11.15587838	825889.529
30.20021358	7.246171722	1007288.248
30.21478909	7.621463285	895995.293
38.22242287	3.438839217	2145481.875
30.92234014	5.568323431	1088121.407
29.23815316	7.663963112	820331.401
29.28054849	11.92227419	914700.307
28.50283793	10.79319107	745384.648
43.80437056	3.371417225	3652129.706
26.99558131	15.82308504	626987.697
28.41328545	11.93129971	796384.439
31.61915385	3.954336559	1107773.322
27.12848964	10.2076072	645408.524
28.39233101	7.584582988	891025.026
33.77866605	3.976373097	1539802.974
28.63819844	6.796496925	764186.256
28.14644915	11.36127984	815358.986
30.98351061	6.376029273	950025.293
34.27627649	2.990752883	1226701.892
44.25997311	3.435795829	3554287.148
29.94905825	6.161730549	956034.514
29.14779614	5.604863329	739045.346
27.89116616	10.41795725	699916.189
31.65985644	5.624785839	1496934.354
27.03572008	9.721447997	562585.893
28.62496865	8.055381308	728682.242
32.34154959	5.111072696	1373025.654
36.7685458	3.690883991	2123983.94
[truncated: 586 more rows]
