# Supplementary material for: Featurization strategies for polymer sequence or composition design by machine learning
Source: Royal Society of Chemistry journal article supplement (doi:10.1039/d1me00160d), 2022-01-01
Supplement: d1me00160d7.csv [file d1me00160d7.csv]

Dataset	Model	Fingerprint	DP	Label	X transform	Y transform	mean r2	se r2	mean mae	se mae
IDP	sfp	mfp	insert	rog	Yeo-Johnson	Yeo-Johnson	0.968409803	0.000912948	1.034462963	0.018477286
IDP	sfp	mfp	none	rog	None	None	0.34152501	0.121046285	6.22637558	0.548080994
IDP	sfp	mfp	scaled	rog	None	None	0.970084624	0.00190971	1.21997714	0.060641517
IDP	sfp	mordred	insert	rog	None	None	0.95123012	0.004590957	1.502041698	0.13484893
IDP	sfp	mordred	none	rog	None	None	-0.003280863	0.003072781	8.77182579	0.030646239
IDP	sfp	mordred	scaled	rog	None	None	0.964636541	0.001021667	1.308580995	0.030965851
IDP	sfp	ohe	insert	rog	Yeo-Johnson	Yeo-Johnson	0.968064682	0.001542249	1.051390127	0.006800917
IDP	sfp	ohe	none	rog	Yeo-Johnson	Yeo-Johnson	0.529608811	0.007113313	4.811541283	0.045074834
IDP	sfp	ohe	scaled	rog	None	None	0.972736198	0.001204858	1.124256849	0.045886258
IDP	sfp	sp	insert	rog	Yeo-Johnson	Yeo-Johnson	0.970819571	0.001730515	0.958522377	0.032836443
IDP	sfp	sp	none	rog	None	None	-0.002730349	0.003138519	8.975374222	0.058603426
IDP	sfp	sp	scaled	rog	None	None	0.969751323	0.001142952	1.129999399	0.038739855
IDP	sfp	esp	insert	rog	Yeo-Johnson	Yeo-Johnson	0.960272909	0.003990377	0.986605728	0.024068493
IDP	sfp	esp	none	rog	None	None	-0.000740745	0.001234365	8.878434181	0.047207606
IDP	sfp	esp	scaled	rog	None	None	0.971598961	0.0016597	1.121124029	0.06006019
IDP	sfp	mfp	insert	cv	Yeo-Johnson	Yeo-Johnson	0.866505789	0.008388335	2.105399961	0.049824335
IDP	sfp	mfp	none	cv	None	None	0.18404722	0.005916035	5.801697731	0.090833877
IDP	sfp	mfp	scaled	cv	Yeo-Johnson	Yeo-Johnson	0.882325849	0.008778314	2.024901457	0.038125267
IDP	sfp	mordred	insert	cv	None	None	0.829281494	0.017640147	2.43810606	0.106052945
IDP	sfp	mordred	none	cv	None	None	0.011852125	0.011962168	7.015795708	0.093645253
IDP	sfp	mordred	scaled	cv	None	None	0.75059996	0.031177967	4.419901371	0.774522818
IDP	sfp	ohe	insert	cv	Yeo-Johnson	Yeo-Johnson	0.871914894	0.003971162	2.037104648	0.066040474
IDP	sfp	ohe	none	cv	None	None	0.172741664	0.007750336	5.865544319	0.060355412
IDP	sfp	ohe	scaled	cv	Yeo-Johnson	Yeo-Johnson	0.871258214	0.005712029	2.067980472	0.026045071
IDP	sfp	sp	insert	cv	Yeo-Johnson	Yeo-Johnson	0.861858365	0.008805498	2.124577372	0.07349804
IDP	sfp	sp	none	cv	None	None	-0.024030603	0.002473658	7.298484802	0.101768765
IDP	sfp	sp	scaled	cv	Yeo-Johnson	Yeo-Johnson	0.853917599	0.007833044	2.222735214	0.043080921
IDP	sfp	esp	insert	cv	None	None	0.813174353	0.010441455	2.890219688	0.146231365
IDP	sfp	esp	scaled	cv	None	None	0.821429893	0.018031506	2.655728579	0.114546409
IDP	sfp	esp	none	cv	None	None	-0.031694722	0.002893681	7.335792542	0.083977939
IDP	sfp	mfp	insert	taus	None	None	0.750391028	0.046554249	332709.1875	24772.45029
IDP	sfp	mfp	none	taus	None	None	0.068381697	0.016091079	853480	31956.75851
IDP	sfp	mfp	scaled	taus	Yeo-Johnson	Yeo-Johnson	0.714145338	0.064159085	321694.8525	23552.21005
IDP	sfp	mordred	insert	taus	None	None	0.770086267	0.040593448	325223.875	17999.15407
IDP	sfp	mordred	none	taus	None	None	-0.0446779	0.006133566	1025728.813	28511.70972
IDP	sfp	mordred	scaled	taus	None	None	0.552821629	0.067839454	480391.0938	32806.02062
IDP	sfp	ohe	insert	taus	None	None	0.710054091	0.053551446	356742	14430.02971
IDP	sfp	ohe	none	taus	None	None	0.021448884	0.009067211	888632.3125	28948.55006
IDP	sfp	ohe	scaled	taus	Yeo-Johnson	Yeo-Johnson	0.773687933	0.057416503	305316.0905	28974.80626
IDP	sfp	sp	insert	taus	Yeo-Johnson	Yeo-Johnson	0.759783134	0.057317468	276063.4734	23038.22252
IDP	sfp	sp	none	taus	None	None	-0.053632462	0.007734671	1010495.688	29682.04499
IDP	sfp	sp	scaled	taus	None	None	0.702084028	0.066786761	325134.875	25579.59746
IDP	sfp	esp	insert	taus	None	None	0.724649953	0.042454526	359786.3438	18732.49178
IDP	sfp	esp	scaled	taus	None	None	0.782881659	0.085218499	299127.4063	39800.79414
IDP	sfp	esp	none	taus	None	None	-0.051502125	0.006461934	1012690.375	28215.87269
IDP	cnn	ohe	N/A	rog	None	None	0.952353742	0.001802679	1.404772758	0.024310151
IDP	cnn	sp	N/A	rog	None	None	0.946913609	0.002305116	1.457725167	0.043274326
IDP	cnn	esp	N/A	rog	None	None	0.953296857	0.001593696	1.390839219	0.050538794
IDP	cnn	mfp	N/A	rog	None	None	0.95953559	0.003668487	1.217988968	0.089547892
IDP	cnn	mordred	N/A	rog	None	None	0.953422942	0.003465664	1.414720416	0.117257684
IDP	graphs	ohe	N/A	rog	None	None	0.944171407	0.006153592	1.807894707	0.132585742
IDP	graphs	sp	N/A	rog	None	None	0.952268961	0.001768493	1.61718142	0.054915737
IDP	graphs	esp	N/A	rog	None	None	0.944593586	0.003835554	1.450888991	0.042366885
IDP	graphs	mfp	N/A	rog	None	None	0.938132975	0.007632811	1.924472809	0.177662237
IDP	graphs	mordred	N/A	rog	None	None	0.950664589	0.002030842	1.450292826	0.036956975
IDP	sfp	sfp_desc	N/A	rog	None	None	0.985922616	0.000575709	0.762827098	0.022114119
SA	sfp	ohe	N/A	rog	None	None	0.931958969	0.004795977	128.9838104	2.486428237
SA	sfp	sps	N/A	rog	None	None	0.942771021	0.001741664	121.0139389	2.150064822
SA	sfp	esps	N/A	rog	None	None	0.943029328	0.003277454	119.0821533	2.939447085
SA	cnn	ohe	N/A	rog	None	None	0.945969	0.0032031	110.8	0.941314
SA	cnn	sps	N/A	rog	None	None	0.954967148	0.003004937	108.3943939	3.062195014
SA	cnn	esps	N/A	rog	None	None	0.949985447	0.005403431	113.4417267	5.019525812
SA	sfp	sfp_desc	N/A	rog	None	None	0.949444396	0.004573501	115.499649	4.215054756
AB	sfp	ohe	N/A	e	None	None	0.945864329	0.00073875	0.527255356	0.003728753
AB	sfp	sp	N/A	e	None	None	0.946006916	0.000642267	0.528649747	0.001692796
AB	sfp	ohe_desc	N/A	e	None	None	0.979769636	0.000302186	0.323906809	0.001855583
AB	sfp	sp_desc	N/A	e	None	None	0.979550676	0.000311049	0.325874478	0.002333064
AB	cnn	ohe	N/A	e	None	None	0.979799514	0.004319098	0.349871665	0.038574795
AB	cnn	sp	N/A	e	None	None	0.984454537	0.003367689	0.310496747	0.028473208
fmri	sfp	mfp	insert	snr	None	None	0.58675747	0.074183711	10.53607559	1.102160123
fmri	sfp	mfp	none	snr	None	None	0.661633464	0.038659402	9.802671432	0.333181088
fmri	sfp	mfp	scaled	snr	None	None	0.618308181	0.040989675	10.26467037	0.877605491
fmri	sfp	mordred	insert	snr	None	None	0.592948986	0.032216512	11.872015	0.582270949
fmri	sfp	mordred	none	snr	None	None	0.622538261	0.033493545	10.89387798	0.543830374
fmri	sfp	mordred	scaled	snr	None	None	0.657870128	0.058538288	10.40565777	1.062161824
fmri	sfp	ohe	insert	snr	None	None	0.725727889	0.043662259	8.265191078	0.440183847
fmri	sfp	ohe	none	snr	None	None	0.699434607	0.046782031	8.646245956	0.62423065
fmri	sfp	ohe	scaled	snr	None	None	0.680561113	0.037758957	9.704386711	0.529648951
